# Supplementary material for: Identification of Distinct Immune Cell Subsets Associated With Asymptomatic Infection, Disease Severity, and Viral Persistence in COVID-19 Patients
Source: Front Immunol. 2022 Feb 22;13:812514. doi: 10.3389/fimmu.2022.812514 (PMC8905648; doi:10.3389/fimmu.2022.812514)
Supplement: Supplementary file 6 [file Table_5.xlsx]

## Sheet:  HC AS SM-T5
p_val	avg_logFC	pct.1	pct.2	p_val_adj	cluster	gene
2.80292e-33	0.332939	1	1	1.10331e-28	AS_5	RPS27
1.36949e-31	0.458183	1	0.991	5.39072e-27	AS_5	RPS29
3.53991e-25	0.454271	0.987	0.952	1.39341e-20	AS_5	RPL23A
1.38263e-22	0.321398	1	0.997	5.44243e-18	AS_5	RPS21
7.01509e-22	0.508354	0.887	0.674	2.76135e-17	AS_5	RPL36A
1.12194e-19	0.378926	0.975	0.956	4.41631e-15	AS_5	RPL38
6.58601e-18	0.504489	0.679	0.543	2.59245e-13	AS_5	RPS2P5
1.22341e-17	0.402545	0.975	0.946	4.8157e-13	AS_5	RPL26
3.32301e-13	0.27522	0.994	0.995	1.30804e-08	AS_5	RPL21
5.90672e-12	0.266684	1	0.997	2.32506e-07	AS_5	RPL37A
1.37658e-11	0.348444	0.547	0.463	5.41865e-07	AS_5	AC024293
1.89414e-11	0.37942	0.314	0.183	7.45592e-07	AS_5	RPS10
1.95945e-11	0.260819	1	0.98	7.71297e-07	AS_5	RPS2
5.61008e-11	0.410932	0.736	0.577	2.20829e-06	AS_5	HIST1H4C
9.98616e-11	0.299565	1	0.993	3.93085e-06	AS_5	MT-ND3
9.66657e-10	0.284542	0.352	0.288	3.80505e-05	AS_5	EIF2S2
1.12473e-09	0.263029	0.145	0.088	4.42728e-05	AS_5	GPR171
1.16602e-09	0.316356	0.925	0.88	4.58981e-05	AS_5	RPS20
1.22301e-09	0.474412	0.484	0.334	4.81413e-05	AS_5	AC245014.1
7.79621e-09	0.452855	0.39	0.304	0.000306882	AS_5	FCGR3A
3.48321e-08	0.275843	0.352	0.277	0.0013711	AS_5	MZT2A
4.02141e-08	0.419575	0.742	0.604	0.00158295	AS_5	MT-ND6
4.0826e-08	0.277758	0.547	0.491	0.00160703	AS_5	DEK
2.20164e-07	0.28189	0.585	0.499	0.00866632	AS_5	NDUFA3
2.64847e-07	0.33901	0.836	0.799	0.0104252	AS_5	IFITM2
4.80792e-07	0.298373	0.491	0.387	0.0189254	AS_5	OSBPL8
8.13163e-07	0.262754	0.497	0.428	0.0320086	AS_5	RPL22
2.84579e-06	0.273824	0.503	0.434	0.112019	AS_5	PYHIN1
3.00155e-06	0.323963	0.44	0.352	0.11815	AS_5	HLA-DQA1
5.50544e-06	0.311789	0.579	0.538	0.216711	AS_5	KLRD1
6.91715e-06	0.283987	0.805	0.731	0.27228	AS_5	PLEK
4.30761e-05	0.263057	0.585	0.511	1	AS_5	RESF1
6.06869e-05	0.270656	0.314	0.219	1	AS_5	LINC01871
0.000388879	0.426036	0.119	0.04	1	AS_5	TRAV5
0.0024337	0.598386	0.126	0.049	1	AS_5	TRBV9
0.00296092	0.377538	0.132	0.06	1	AS_5	TRAV19
0.00326921	0.30907	0.201	0.147	1	AS_5	TRGV2
0.00353919	0.44405	0.195	0.116	1	AS_5	TRGV9
0.00656515	0.330301	0.252	0.149	1	AS_5	TRGV10
1.05336e-35	0.762078	0.127	0.016	4.14634e-31	HC_5	TRBV15
7.60267e-34	0.283978	0.999	0.99	2.99264e-29	HC_5	MT-ND5
4.7152e-31	0.456793	0.51	0.277	1.85604e-26	HC_5	KLRB1
4.65664e-26	0.540279	0.141	0.032	1.83299e-21	HC_5	TRAV17
3.02221e-17	0.361306	0.434	0.285	1.18963e-12	HC_5	FCGR3A
3.10577e-14	0.662901	0.109	0.035	1.22252e-09	HC_5	TRBV2
2.88473e-13	0.281861	0.322	0.197	1.13552e-08	HC_5	XCL2
5.569e-13	0.328305	0.206	0.105	2.19213e-08	HC_5	TRGV4
2.64737e-12	0.353479	0.222	0.141	1.04208e-07	HC_5	TRGV10
1.31317e-11	0.436502	0.206	0.105	5.16903e-07	HC_5	TYROBP
3.90049e-07	0.359911	0.145	0.079	0.0153535	HC_5	TRBV28
3.94879e-51	0.753651	0.551	0.331	1.55436e-46	SM_5	DUSP2
1.50191e-45	0.533106	0.915	0.822	5.91197e-41	SM_5	TSC22D3
6.08535e-45	0.428072	0.809	0.587	2.39537e-40	SM_5	HLA-DRB5
5.17869e-39	0.402071	0.92	0.84	2.03849e-34	SM_5	BTG1
3.31614e-37	0.414395	0.735	0.549	1.30533e-32	SM_5	NEAT1
1.34031e-36	0.436422	0.812	0.652	5.27588e-32	SM_5	DUSP1
4.17456e-36	0.546351	0.41	0.23	1.64323e-31	SM_5	PMAIP1
1.26854e-34	0.343335	0.991	0.971	4.99337e-30	SM_5	H3F3B
1.66492e-34	0.508021	0.458	0.232	6.55363e-30	SM_5	RPS4Y1
2.66601e-33	0.400344	0.69	0.533	1.04942e-28	SM_5	CD69
5.0755e-33	0.394134	0.649	0.543	1.99787e-28	SM_5	ADGRE5
1.64043e-32	0.419452	0.848	0.728	6.45724e-28	SM_5	ZFP36L2
1.99233e-30	0.351871	0.437	0.228	7.84242e-26	SM_5	HLA-DQA2
1.64253e-29	0.385798	0.938	0.895	6.4655e-25	SM_5	JUN
3.74814e-29	0.412788	0.523	0.337	1.47538e-24	SM_5	CXCR4
1.05253e-28	0.348337	0.282	0.131	4.14309e-24	SM_5	BTG3
7.14595e-28	0.278484	0.956	0.909	2.81286e-23	SM_5	HSP90AA1
4.4689e-25	0.322033	0.898	0.802	1.75909e-20	SM_5	MT-ATP8
9.7972e-24	0.270322	0.836	0.71	3.85647e-19	SM_5	LY6E
1.39479e-23	0.332351	0.701	0.569	5.49031e-19	SM_5	SAT1
2.1622e-23	0.34424	0.387	0.228	8.51105e-19	SM_5	JUND
2.9823e-23	0.407877	0.509	0.33	1.17392e-18	SM_5	FGFBP2
3.41744e-23	0.408673	0.589	0.437	1.34521e-18	SM_5	HLA-DRA
1.29427e-22	0.367618	0.604	0.426	5.09463e-18	SM_5	TNFAIP3
3.23732e-22	0.420915	0.539	0.394	1.27431e-17	SM_5	FOS
3.6315e-22	0.360699	0.517	0.379	1.42947e-17	SM_5	ZFP36
5.96692e-22	0.353805	0.269	0.146	2.34876e-17	SM_5	NR4A2
1.0888e-21	0.373	0.267	0.136	4.28585e-17	SM_5	DDIT4
2.602e-21	0.294006	0.521	0.388	1.02423e-16	SM_5	KLF2
4.91054e-21	0.339414	0.438	0.301	1.93294e-16	SM_5	ATG2A
9.72049e-21	0.314094	0.348	0.251	3.82628e-16	SM_5	SLC2A3
1.11384e-20	0.29036	0.801	0.667	4.38439e-16	SM_5	IER2
1.36041e-20	0.403113	0.239	0.14	5.35498e-16	SM_5	RHOB
3.67028e-20	0.285631	0.454	0.307	1.44473e-15	SM_5	HERPUD1
6.82781e-20	0.263068	0.496	0.333	2.68763e-15	SM_5	MCL1
9.12767e-20	0.289032	0.964	0.941	3.59292e-15	SM_5	KLF6
3.12467e-18	0.265272	0.877	0.776	1.22996e-13	SM_5	JUNB
5.57969e-18	0.274572	0.457	0.309	2.19634e-13	SM_5	CD6
9.51998e-17	0.302193	0.371	0.228	3.74735e-12	SM_5	IFNG
1.44425e-15	0.271783	0.278	0.17	5.68501e-11	SM_5	NFKBIZ
3.51007e-08	0.263331	0.559	0.463	0.00138167	SM_5	LGALS1

## Sheet: HC AS MD SD SDR-M7
p_val	avg_logFC	pct.1	pct.2	p_val_adj	cluster	gene
9.69774e-06	0.99709	0.429	0.049	0.381732	AS_7	FOXK1
1.09767e-05	1.06087	0.429	0.371	0.432076	AS_7	CAPZA2
1.35183e-05	1.09846	0.143	0.056	0.532119	AS_7	MRPL17
1.49684e-05	1.16576	0.143	0.02	0.589202	AS_7	ACO1
2.24759e-05	0.852199	0.286	0.008	0.884719	AS_7	TTPAL
3.76742e-05	1.34713	0.857	0.322	1	AS_7	HLA-DQB1
6.85739e-05	0.779088	0.286	0.032	1	AS_7	POLD2
7.03426e-05	1.39778	0.571	0.115	1	AS_7	IARS2
7.9729e-05	0.668555	0.143	0.004	1	AS_7	C8orf31
8.07827e-05	0.849924	0.857	0.775	1	AS_7	RPL26
8.23134e-05	1.21724	0.857	0.506	1	AS_7	RPL36A
8.74009e-05	1.32792	0.429	0.119	1	AS_7	EPB41
8.7867e-05	1.01697	0.143	0.087	1	AS_7	OAT
0.000115391	1.09159	0.143	0.052	1	AS_7	PIGF
0.000128377	1.1738	0.143	0.015	1	AS_7	ERCC6
0.000138572	0.797849	0.286	0.031	1	AS_7	UBL7-AS1
0.000138759	1.20649	0.286	0.109	1	AS_7	KDM5C
0.00013924	1.10728	0.143	0.045	1	AS_7	ATXN7L1
0.00014677	0.343942	1	0.904	1	AS_7	RPL9
0.000162945	1.44745	0.429	0.013	1	AS_7	MTND1P23
0.000174112	0.93402	0.143	0.133	1	AS_7	CLPP
0.000252157	0.81963	0.429	0.102	1	AS_7	AC020911.1
0.000329448	0.322585	0.571	0.443	1	AS_7	JAK1
0.000332572	1.18184	0.571	0.34	1	AS_7	SNHG5
0.000345877	1.03776	0.429	0.072	1	AS_7	MAP3K4
0.000345973	1.2951	0.286	0.065	1	AS_7	CRYZL1
0.000368451	0.915888	0.143	0.139	1	AS_7	RAB4A
0.00040077	1.16324	0.429	0.369	1	AS_7	NCL
0.000446852	1.01973	0.143	0.082	1	AS_7	TSN
0.000469098	1.03735	0.143	0.072	1	AS_7	TMTC2
0.000469508	1.16348	0.143	0.02	1	AS_7	AL117335
0.000474966	0.814578	0.429	0.398	1	AS_7	YWHAE
0.000483658	0.717919	0.286	0.065	1	AS_7	RRM2B
0.00054544	0.695351	0.286	0.252	1	AS_7	CMIP
0.000556265	0.350232	0.143	0.001	1	AS_7	TMEM177
0.000592861	1.14746	0.429	0.361	1	AS_7	ATP6AP2
0.000600839	0.864873	0.286	0.001	1	AS_7	RN7SL47P
0.000615463	0.718907	0.286	0.388	1	AS_7	EIF2S3
0.000629777	0.586668	0.286	0.142	1	AS_7	JAGN1
0.000708095	0.766708	0.286	0.309	1	AS_7	EWSR1
0.000713945	0.468388	0.286	0.172	1	AS_7	FAM192A
0.000741375	0.900898	0.143	0.141	1	AS_7	ALKBH5
0.000750128	1.15005	0.571	0.262	1	AS_7	LEPROT
0.000773709	0.952507	0.143	0.115	1	AS_7	PTAR1
0.000800754	1.01968	0.143	0.082	1	AS_7	MORC3
0.000817031	1.08441	0.143	0.051	1	AS_7	PSMD10
0.00086647	0.966353	0.286	0.193	1	AS_7	SRPRA
0.000908661	1.30356	0.429	0.093	1	AS_7	PSME4
0.000939185	0.704154	0.286	0.062	1	AS_7	PIK3C2A
0.00121432	1.18832	0.429	0.171	1	AS_7	ATP5PO
0.00121835	0.994456	0.143	0.091	1	AS_7	CXXC1
0.00124636	0.775149	0.286	0.34	1	AS_7	VCP
0.00125559	0.318558	0.286	0.225	1	AS_7	ITPK1
0.00126264	0.819386	0.143	0.18	1	AS_7	MFNG
0.00135808	1.09457	0.571	0.43	1	AS_7	NSA2
0.00139562	0.566226	0.286	0.138	1	AS_7	DNTTIP1
0.00140163	0.773908	0.286	0.033	1	AS_7	PRPS1
0.0014161	1.12057	0.143	0.036	1	AS_7	NUP88
0.00143693	1.11608	0.143	0.039	1	AS_7	PMS2P1
0.00147903	1.0331	0.714	0.405	1	AS_7	ATP5F1C
0.00168983	0.907913	0.143	0.127	1	AS_7	SMC5
0.00173138	0.525573	0.286	0.157	1	AS_7	MTND2P28
0.0018529	0.722184	0.286	0.039	1	AS_7	ARID3B
0.00194258	0.94219	0.143	0.059	1	AS_7	PDXDC1
0.00196134	1.08833	0.286	0.092	1	AS_7	XIAP
0.00200701	1.1564	0.571	0.403	1	AS_7	PRR13
0.00201938	0.649947	0.286	0.089	1	AS_7	DENND4A
0.00222288	0.545886	0.286	0.157	1	AS_7	BTF3L4
0.00227248	0.987636	0.429	0.139	1	AS_7	CS
0.00230481	0.553036	0.286	0.128	1	AS_7	FHOD1
0.00244847	0.791622	0.143	0.188	1	AS_7	NDUFV1
0.00246668	0.91488	0.286	0.104	1	AS_7	DHX57
0.00252875	0.620147	0.286	0.105	1	AS_7	THUMPD3-AS1
0.00253706	0.602466	0.286	0.102	1	AS_7	SMC3
0.00262975	1.03499	0.143	0.071	1	AS_7	APOPT1
0.00266387	0.943549	0.143	0.11	1	AS_7	SLC31A1
0.0026856	0.65501	0.429	0.345	1	AS_7	RNASE6
0.00269264	0.579422	0.286	0.115	1	AS_7	CCNH
0.00274155	0.36632	0.286	0.24	1	AS_7	SCP2
0.00282647	0.490143	0.143	0.001	1	AS_7	AL359921
0.00293655	1.36868	0.857	0.381	1	AS_7	AC245014.1
0.00295268	1.29533	0.286	0.079	1	AS_7	ISG20L2
0.00304911	0.427584	0.286	0.193	1	AS_7	FNBP4
0.00309901	0.846878	0.143	0.158	1	AS_7	DOCK11
0.00314717	1.20395	0.143	0.002	1	AS_7	RNASEH2B-AS1
0.00321064	0.444765	0.571	0.415	1	AS_7	RNF181
0.00336104	0.747988	0.429	0.432	1	AS_7	NPM1
0.00340269	0.981748	0.143	0.038	1	AS_7	ODR4
0.00343652	1.07425	0.143	0.055	1	AS_7	GORASP1
0.0034497	0.882019	0.143	0.142	1	AS_7	STX4
0.00345759	0.772408	0.571	0.675	1	AS_7	ARPC5
0.00351651	0.886452	0.143	0.138	1	AS_7	TBC1D5
0.00375891	0.436996	0.286	0.174	1	AS_7	NLRP12
0.00377006	0.702636	0.286	0.063	1	AS_7	TCOF1
0.00388567	0.848208	0.286	0.058	1	AS_7	SAMD1
0.00389923	1.22727	0.286	0.056	1	AS_7	ABCC1
0.00400905	1.01148	0.286	0.178	1	AS_7	GTF2H5
0.00401078	0.832325	0.286	0.063	1	AS_7	CHPT1
0.00411275	0.297964	0.286	0.26	1	AS_7	TET2
0.00416333	0.896172	0.571	0.103	1	AS_7	UBE2E2
0.0042491	0.271028	0.286	0.269	1	AS_7	GADD45GIP1
0.0042838	0.63524	0.286	0.083	1	AS_7	ZNF518A
0.00430891	0.323596	0.286	0.238	1	AS_7	PRKAG2
0.00446987	0.631976	0.286	0.08	1	AS_7	AC012368.1
0.0045749	1.06162	0.286	0.136	1	AS_7	CLPTM1
0.00458122	0.671265	0.143	0.002	1	AS_7	AC104964
0.00458849	0.95055	0.286	0.196	1	AS_7	STAU1
0.00459863	0.622369	0.286	0.09	1	AS_7	PSD4
0.00469087	1.00821	0.143	0.075	1	AS_7	KIF1B
0.00478455	0.874644	0.286	0.041	1	AS_7	LINC00482
0.00493149	0.978172	0.143	0.093	1	AS_7	CLMN
0.00500181	0.734833	0.286	0.118	1	AS_7	TBC1D9B
0.00510876	1.15518	0.143	0.02	1	AS_7	ZNF252P
0.00522109	0.84947	0.429	0.4	1	AS_7	ATF4
0.00539902	0.648412	0.286	0.093	1	AS_7	ELK3
0.00548888	0.600926	0.286	0.098	1	AS_7	LUC7L
0.00558054	0.710119	0.286	0.052	1	AS_7	ARNTL
0.00563739	0.278763	0.143	0.002	1	AS_7	AC133919
0.00581494	0.508555	0.286	0.132	1	AS_7	RREB1
0.00587649	0.624987	0.286	0.544	1	AS_7	SMCHD1
0.00591676	0.67205	0.714	0.671	1	AS_7	C1orf162
0.00597671	1.06032	0.143	0.056	1	AS_7	ANKZF1
0.0060229	0.696999	0.571	0.299	1	AS_7	MKNK2
0.00626143	0.958428	0.143	0.099	1	AS_7	MAU2
0.00630216	0.729567	0.286	0.119	1	AS_7	URM1
0.00635853	0.969893	0.571	0.342	1	AS_7	ELOC
0.00636683	0.799735	0.857	0.331	1	AS_7	ANKRD11
0.00640226	0.436199	1	0.995	1	AS_7	MT-CO1
0.00647092	0.712891	0.571	0.54	1	AS_7	COX6A1
0.00658119	0.967143	0.714	0.272	1	AS_7	ITGB1
0.0066217	0.70857	0.571	0.266	1	AS_7	MSL3
0.006704	0.478089	0.143	0.329	1	AS_7	PSMA4
0.0068104	0.919039	0.143	0.114	1	AS_7	ZFYVE16
0.00682575	0.81734	0.143	0.162	1	AS_7	ABCF1
0.00701863	0.643901	0.286	0.238	1	AS_7	ANAPC15
0.00709344	1.14485	0.286	0.1	1	AS_7	ATP2B4
0.00729574	0.855364	0.429	0.335	1	AS_7	IQGAP2
0.00749117	0.416526	0.286	0.18	1	AS_7	SNAP29
0.00760691	0.836791	0.429	0.357	1	AS_7	LRPAP1
0.00765515	0.716975	0.286	0.338	1	AS_7	SORL1
0.00775581	0.848729	0.143	0.149	1	AS_7	GPBAR1
0.00777314	1.04018	0.429	0.169	1	AS_7	MRPL11
0.00777376	0.506618	0.286	0.436	1	AS_7	CPVL
0.00798094	0.995188	0.429	0.235	1	AS_7	SPG7
0.00826993	0.79008	0.571	0.616	1	AS_7	CD48
0.00829672	1.07268	0.143	0.05	1	AS_7	UBN2
0.00831361	0.839749	0.286	0.252	1	AS_7	MAF1
0.00850492	0.407327	0.286	0.177	1	AS_7	PNPLA8
0.00857419	1.14629	0.429	0.13	1	AS_7	CCDC47
0.00864003	0.938565	0.429	0.079	1	AS_7	AKAP8L
0.00882228	0.580815	0.286	0.125	1	AS_7	ARSA
0.00891327	0.399348	0.286	0.215	1	AS_7	PSMG2
0.00908203	0.341346	1	0.998	1	AS_7	MALAT1
0.00928277	0.633892	0.286	0.088	1	AS_7	SUCO
0.00954385	0.948081	0.143	0.051	1	AS_7	CEP95
0.00958477	0.728969	0.286	0.182	1	AS_7	TBL1X
0.0096872	0.344355	0.286	0.21	1	AS_7	IK
0.00983815	0.748642	0.286	0.106	1	AS_7	MED4
0.00999861	0.521349	0.286	0.124	1	AS_7	MPP7
0.0101228	0.728141	0.286	0.202	1	AS_7	YWHAQ
0.0101498	0.747967	0.143	0.189	1	AS_7	ROGDI
0.0102538	0.470455	0.286	0.156	1	AS_7	VAV1
0.0102619	0.432059	0.286	0.186	1	AS_7	SND1
0.0104595	0.419179	0.286	0.193	1	AS_7	MAGOH
0.0104715	0.405309	0.286	0.203	1	AS_7	PDAP1
0.0107195	1.06795	0.286	0.118	1	AS_7	KIF13A
0.010841	0.766665	0.143	0.18	1	AS_7	FNIP1
0.0110509	1.11599	0.286	0.081	1	AS_7	KCMF1
0.0110559	1.00797	0.143	0.023	1	AS_7	TSPY26P
0.0111461	0.674957	0.143	0	1	AS_7	LINC02043
0.0111461	0.538372	0.143	0	1	AS_7	MIR576
0.0111461	0.522254	0.143	0	1	AS_7	AC090796
0.0111461	0.522254	0.143	0	1	AS_7	AC010761
0.0111461	0.491422	0.143	0	1	AS_7	RPS15AP11
0.0111461	0.491422	0.143	0	1	AS_7	AC244453.1
0.0111461	0.491422	0.143	0	1	AS_7	RPL36AP13
0.0111461	0.491422	0.143	0	1	AS_7	NUTM2D
0.0111461	0.351735	0.143	0	1	AS_7	MCOLN2
0.0111461	0.28984	0.143	0	1	AS_7	HIST1H2BPS2
0.0111461	0.28984	0.143	0	1	AS_7	AC132192
0.0111667	0.777831	0.286	0.233	1	AS_7	VTI1B
0.0112417	0.925646	0.429	0.312	1	AS_7	VAMP2
0.0112807	1.02343	0.714	0.319	1	AS_7	EMILIN2
0.0113326	0.499911	0.286	0.127	1	AS_7	RBM26
0.0113812	1.09362	0.571	0.247	1	AS_7	RFLNB
0.0114036	0.845664	0.286	0.21	1	AS_7	PHF20
0.0114192	0.727196	0.143	0.203	1	AS_7	METRNL
0.0114812	0.499612	0.286	0.026	1	AS_7	RFX3
0.0116244	0.512756	0.143	0.188	1	AS_7	PPP6C
0.0116392	0.7209	0.429	0.206	1	AS_7	ARHGAP27
0.0119401	1.16886	0.143	0.012	1	AS_7	SP4
0.0120026	0.588613	0.286	0.106	1	AS_7	PAN3
0.0123539	0.563847	0.571	0.384	1	AS_7	STK4
0.0123999	0.820427	0.429	0.293	1	AS_7	GNAQ
0.0124181	0.474283	0.429	0.303	1	AS_7	SHTN1
0.0126429	0.434312	0.286	0.166	1	AS_7	KDM7A
0.0127351	0.839383	0.143	0.148	1	AS_7	ZNF800
0.0127617	0.588461	0.857	0.872	1	AS_7	MT-ND4L
0.013096	0.44271	0.143	0.341	1	AS_7	SEPT7
0.0135072	0.570494	0.286	0.118	1	AS_7	OIP5-AS1
0.0136353	0.71169	0.571	0.197	1	AS_7	KIAA0319L
0.0141832	0.581906	0.286	0.174	1	AS_7	ATP6V0A1
0.0142341	0.556644	0.286	0.126	1	AS_7	PSIP1
0.014346	0.595306	0.571	0.325	1	AS_7	TRMT1
0.0144116	1.20675	0.143	0.001	1	AS_7	WDR62
0.0144962	0.938746	0.429	0.271	1	AS_7	NDUFA11
0.0148472	0.393464	0.286	0.173	1	AS_7	NFIL3
0.014877	0.501926	0.286	0.026	1	AS_7	EEF1AKNMT
0.0148803	0.607027	0.286	0.242	1	AS_7	PIAS1
0.0152524	1.04642	0.286	0.104	1	AS_7	CMC1
0.0153985	0.431834	0.286	0.129	1	AS_7	STEAP4
0.0156461	0.660111	0.714	0.613	1	AS_7	RAC2
0.0158389	0.776699	0.143	0.173	1	AS_7	FAM111A
0.0158575	1.04317	0.286	0.099	1	AS_7	NXPE3
0.016043	0.970877	0.429	0.156	1	AS_7	AP003733
0.0161395	0.505898	0.857	0.589	1	AS_7	ATP5PD
0.0161912	0.871194	0.286	0.197	1	AS_7	CD300A
0.0163232	0.455836	0.286	0.035	1	AS_7	C8orf82
0.0164195	0.961155	0.714	0.354	1	AS_7	HP1BP3
0.0164466	0.80754	0.286	0.226	1	AS_7	POLR2F
0.0167461	0.288338	0.143	0.001	1	AS_7	AC090948
0.0167725	0.732798	0.857	0.824	1	AS_7	ATP5MG
0.016817	0.562693	0.429	0.577	1	AS_7	HCK
0.0171048	0.324819	0.286	0.223	1	AS_7	IRF5
0.0171856	0.398539	0.286	0.222	1	AS_7	GTF3C6
0.0172143	0.692921	0.286	0.022	1	AS_7	DST
0.0173478	0.310676	0.286	0.227	1	AS_7	SEPT2
0.017538	0.48086	0.286	0.166	1	AS_7	PUF60
0.0175708	0.749031	0.286	0.255	1	AS_7	SNRPC
0.01796	0.769324	0.143	0.176	1	AS_7	COX19
0.018033	0.776172	0.286	0.076	1	AS_7	HECTD4
0.018252	0.741478	0.571	0.578	1	AS_7	DEK
0.018462	0.620217	1	0.8	1	AS_7	JUN
0.0184679	0.28699	0.286	0.239	1	AS_7	TBRG1
0.0187168	0.898997	0.571	0.335	1	AS_7	CTSC
0.0189079	0.620584	0.429	0.486	1	AS_7	PPP1R18
0.0189175	0.884976	0.571	0.522	1	AS_7	GRK2
0.0189555	0.531343	0.286	0.423	1	AS_7	AURKAIP1
0.0189919	0.600884	0.429	0.272	1	AS_7	IL6R
0.019112	0.663714	0.143	0.006	1	AS_7	CPLANE1
0.0196157	0.543207	0.429	0.258	1	AS_7	CD163
0.0196398	0.54214	0.571	0.707	1	AS_7	CHCHD2
0.0196405	0.484634	0.286	0.434	1	AS_7	LRRK2
0.0197674	0.674754	0.143	0.173	1	AS_7	SNRPA
0.0198859	0.550011	0.143	0.283	1	AS_7	HEBP2
0.0200578	0.268252	0.286	0.24	1	AS_7	CNIH4
0.0201743	0.955816	0.857	0.374	1	AS_7	AC109326
0.0202692	0.853972	0.286	0.225	1	AS_7	SH3BP1
0.0203407	0.789942	0.714	0.469	1	AS_7	COPS9
0.0204874	0.750005	0.286	0.09	1	AS_7	NOD2
0.0206091	0.935077	0.429	0.26	1	AS_7	IKZF1
0.0206652	0.56807	0.286	0.397	1	AS_7	CIB1
0.0209709	0.364572	0.286	0.282	1	AS_7	TNRC6B
0.0212495	0.807998	0.714	0.263	1	AS_7	SREK1
0.0212581	0.540916	0.286	0.394	1	AS_7	COX7A2L
0.0214043	0.689376	0.286	0.031	1	AS_7	SNAPC3
0.0217251	0.750161	0.286	0.247	1	AS_7	HIPK3
0.0217349	0.489287	0.143	0.001	1	AS_7	AC009118.2
0.0218453	1.03327	0.286	0.107	1	AS_7	PSPC1
0.022716	0.683883	0.286	0.023	1	AS_7	USP11
0.0228547	0.662281	0.429	0.228	1	AS_7	SPEN
0.0229745	0.748961	0.571	0.499	1	AS_7	PRRC2C
0.023333	0.656731	0.143	0.008	1	AS_7	AMN1
0.0234295	0.720845	0.286	0.263	1	AS_7	PPP1R12A
0.0234868	0.760026	0.286	0.087	1	AS_7	Z93930
0.023531	0.839246	0.286	0.082	1	AS_7	NKAPD1
0.023852	0.935117	0.143	0.048	1	AS_7	AL357060
0.0239864	0.748505	0.429	0.109	1	AS_7	PLOD1
0.0241475	0.994408	0.571	0.259	1	AS_7	NIN
0.0242368	0.741842	0.857	0.782	1	AS_7	UBL5
0.0242873	0.517865	0.143	0.002	1	AS_7	GPR82
0.0247841	1.10374	0.143	0.033	1	AS_7	VNN3
0.0250797	0.640016	0.429	0.336	1	AS_7	CIAO2B
0.0256223	0.638425	0.286	0.039	1	AS_7	ARL1
0.0256621	0.297856	0.857	0.972	1	AS_7	RPL32
0.0260058	0.731936	0.286	0.266	1	AS_7	VDAC2
0.0269522	0.41148	0.286	0.186	1	AS_7	PCNP
0.0272941	0.491315	0.286	0.288	1	AS_7	KIAA0930
0.0273161	0.482562	0.286	0.034	1	AS_7	NUAK2
0.0275681	0.801115	0.286	0.059	1	AS_7	AC131009.1
0.0276096	0.417031	0.286	0.176	1	AS_7	DENR
0.027626	0.610416	0.429	0.261	1	AS_7	DNAJC4
0.0282203	0.366897	0.429	0.362	1	AS_7	DNAJC15
0.028243	0.974859	0.429	0.19	1	AS_7	CPD
0.0290313	0.740583	0.429	0.115	1	AS_7	RNF19A
0.0292937	0.391752	0.857	0.552	1	AS_7	SON
0.0294366	0.853515	0.143	0.131	1	AS_7	MDM2
0.029926	0.372052	0.286	0.35	1	AS_7	CHCHD10
0.0301068	0.448157	0.429	0.61	1	AS_7	MSN
0.0302435	0.338325	0.286	0.228	1	AS_7	TOX4
0.0306894	0.752535	0.286	0.082	1	AS_7	CRK
0.0310719	0.792443	0.286	0.135	1	AS_7	GAPT
0.0315783	0.310689	0.143	0.349	1	AS_7	FAM120A
0.0320921	0.833345	0.143	0.022	1	AS_7	AC104794.1
0.0322578	0.736156	0.143	0.183	1	AS_7	DAPP1
0.0326125	0.748167	0.286	0.085	1	AS_7	ARFIP1
0.0327799	0.774998	0.286	0.255	1	AS_7	SNX18
0.0328194	0.388991	0.143	0.303	1	AS_7	PABPN1
0.0332563	1.02486	0.429	0.183	1	AS_7	ZBTB43
0.0332577	0.371328	0.286	0.196	1	AS_7	AC027290.1
0.0334826	0.555333	0.429	0.292	1	AS_7	ACADVL
0.0337508	0.695341	0.286	0.116	1	AS_7	RUFY1
0.0342283	0.385777	0.286	0.186	1	AS_7	SEMA4D
0.0347273	0.811283	0.286	0.206	1	AS_7	CREBBP
0.0357368	0.674107	0.143	0.001	1	AS_7	GPRASP1
0.0358374	0.359231	0.571	0.496	1	AS_7	ANAPC11
0.0359965	0.788526	0.286	0.223	1	AS_7	KRT10
0.0360392	0.686537	0.429	0.457	1	AS_7	CASP1
0.0360992	0.79104	0.286	0.247	1	AS_7	TRIM38
0.0363828	0.688543	0.286	0.299	1	AS_7	EIF2S2
0.036584	0.345752	0.143	0.004	1	AS_7	AC116667
0.0370151	0.323175	0.286	0.213	1	AS_7	USP16
0.0373007	0.475484	0.286	0.038	1	AS_7	SPATA2
0.0376297	0.502621	0.286	0.226	1	AS_7	TMEM230
0.0377977	0.952367	0.714	0.309	1	AS_7	FLOT2
0.0382128	0.795447	0.571	0.299	1	AS_7	SSNA1
0.0382748	0.592025	0.286	0.175	1	AS_7	LRRC59
0.0383681	0.729753	0.143	0.066	1	AS_7	PRPF19
0.0384624	0.537796	0.143	0.001	1	AS_7	AL353611
0.0386624	0.536031	0.143	0.001	1	AS_7	AL109806
0.0387308	0.465666	0.286	0.042	1	AS_7	GPD2
0.0388758	0.260891	0.286	0.246	1	AS_7	RTF1
0.0390698	0.515246	0.143	0.004	1	AS_7	TEN1
0.0393304	0.341995	0.857	0.944	1	AS_7	PTMA
0.0407836	0.665214	0.143	0.101	1	AS_7	RASSF1
0.0408924	0.787306	0.286	0.057	1	AS_7	ADAM19
0.0411056	0.577889	0.286	0.346	1	AS_7	TMEM179B
0.0414158	0.416801	0.286	0.457	1	AS_7	SEM1
0.0417376	0.782459	0.286	0.034	1	AS_7	TBCK
0.0417766	0.657985	0.429	0.128	1	AS_7	CCNL2
0.0418938	0.680177	0.286	0.119	1	AS_7	PYM1
0.0422226	0.818755	0.286	0.209	1	AS_7	COLGALT1
0.0433819	0.738722	0.286	0.267	1	AS_7	ARHGAP26
0.0435773	0.673514	0.429	0.078	1	AS_7	BANP
0.0439775	0.593142	0.143	0.121	1	AS_7	SH3BP5
0.0440627	0.651024	0.143	0.011	1	AS_7	OSM
0.0443002	0.781138	0.143	0.115	1	AS_7	CAPN7
0.0447117	0.286795	0.143	0.002	1	AS_7	ZNF530
0.046356	0.591409	0.286	0.136	1	AS_7	ZFAND2B
0.0473438	0.308428	0.429	0.704	1	AS_7	HMGB1
0.0476774	0.868817	0.571	0.309	1	AS_7	PLXNB2
0.0482419	0.627511	0.286	0.146	1	AS_7	FCAR
0.0486086	0.763154	0.286	0.027	1	AS_7	AC078846
0.0486254	0.928002	0.571	0.249	1	AS_7	FOXO3
0.0489663	0.689144	0.286	0.109	1	AS_7	STK11
0.0494415	0.262423	0.286	0.199	1	AS_7	CYP27A1
0.0495187	0.689906	0.286	0.109	1	AS_7	SWAP70
0.0496392	0.690836	0.571	0.482	1	AS_7	CD36
0.0499682	0.295652	0.571	0.493	1	AS_7	ASGR1
3.62038e-08	0.856889	0.429	0.042	0.00142509	MD_7	XIST
6.0854e-06	0.818083	0.929	0.798	0.23954	MD_7	JUN
6.4648e-06	0.835745	0.786	0.478	0.254474	MD_7	RAB11FIP1
7.13993e-06	1.15138	0.679	0.481	0.281049	MD_7	MT2A
8.1684e-06	0.748336	0.286	0.136	0.321533	MD_7	ZCRB1
2.1109e-05	0.680125	0.143	0.077	0.830913	MD_7	TRAPPC9
2.89878e-05	0.474214	0.214	0.271	1	MD_7	SLIRP
3.37443e-05	0.445615	0.179	0.216	1	MD_7	RASGRP4
3.85585e-05	0.510135	0.071	0.121	1	MD_7	ITCH
6.83016e-05	0.606501	1	0.936	1	MD_7	FOS
8.04362e-05	0.809652	0.107	0.067	1	MD_7	EPS8
8.52424e-05	0.38689	0.25	0.296	1	MD_7	SELENOF
0.000142717	0.682888	0.357	0.318	1	MD_7	DYSF
0.000200003	0.560914	0.857	0.777	1	MD_7	FOSB
0.000215063	0.346386	0.393	0.164	1	MD_7	FBRS
0.000291314	0.290661	0.071	0.128	1	MD_7	AFTPH
0.00032107	0.651473	0.143	0.085	1	MD_7	LRMP
0.000559848	0.621434	0.214	0.182	1	MD_7	ABHD5
0.000700834	0.331019	1	0.889	1	MD_7	JUNB
0.000706952	0.644678	0.893	0.731	1	MD_7	CSF3R
0.000878158	0.641871	0.536	0.262	1	MD_7	TOP1
0.000899222	0.491846	0.143	0.126	1	MD_7	C1orf52
0.000980152	0.544433	0.714	0.339	1	MD_7	RSRP1
0.00104661	0.481819	0.25	0.223	1	MD_7	DECR1
0.00110274	0.486452	0.179	0.043	1	MD_7	TSHZ3
0.0012509	0.531226	0.25	0.161	1	MD_7	SEC61A1
0.00132567	0.638218	0.393	0.13	1	MD_7	MTHFS
0.00148379	0.495292	1	0.968	1	MD_7	HLA-C
0.00169311	0.463031	0.286	0.24	1	MD_7	STK38
0.001753	0.402696	0.107	0.145	1	MD_7	IMPA2
0.00197705	0.37515	0.429	0.437	1	MD_7	FAM49B
0.0020408	0.685132	0.179	0.067	1	MD_7	ZBTB16
0.00207948	0.579259	0.214	0.111	1	MD_7	CEP63
0.0021579	0.539923	0.179	0.111	1	MD_7	PLCG2
0.00220713	0.764594	0.536	0.443	1	MD_7	GLUL
0.00277916	0.405264	0.143	0.137	1	MD_7	NBPF26
0.00284285	0.472467	0.179	0.095	1	MD_7	LAMTOR3
0.00285539	0.366262	0.143	0.01	1	MD_7	NBPF15
0.00292262	0.524182	0.179	0.051	1	MD_7	FCHO2
0.00295746	0.585995	0.321	0.186	1	MD_7	ITGB2-AS1
0.00296675	0.367906	0.607	0.345	1	MD_7	AHR
0.00301387	0.631928	0.357	0.185	1	MD_7	SMARCC2
0.00312883	0.570429	0.357	0.243	1	MD_7	TMX4
0.00316174	0.60778	0.464	0.227	1	MD_7	CSNK1D
0.00332122	0.424845	0.25	0.079	1	MD_7	TRAPPC6A
0.00334104	0.501503	0.179	0.089	1	MD_7	HSPB11
0.00340011	0.408112	0.286	0.06	1	MD_7	ATG14
0.00347304	0.505774	0.5	0.298	1	MD_7	MAN2B1
0.00349454	0.562385	0.286	0.081	1	MD_7	B3GNT2
0.00360645	0.741685	0.643	0.443	1	MD_7	RGS2
0.00381387	0.300486	0.107	0.005	1	MD_7	WDR53
0.00394415	0.56767	0.286	0.174	1	MD_7	CXCL16
0.00410983	0.580269	0.5	0.283	1	MD_7	ADIPOR1
0.00418376	0.304245	0.179	0.038	1	MD_7	L3MBTL3
0.00457453	0.409681	0.357	0.142	1	MD_7	CNOT2
0.00469385	0.360104	0.357	0.108	1	MD_7	LRRC58
0.00476348	0.36385	0.107	0.107	1	MD_7	E2F3
0.0050047	0.529284	0.643	0.549	1	MD_7	VMP1
0.00505324	0.51277	0.393	0.258	1	MD_7	TUBB4B
0.0050624	0.380858	0.107	0.108	1	MD_7	UBE2G1
0.00523616	0.49546	0.321	0.216	1	MD_7	EMC3
0.0053112	0.371662	0.964	0.754	1	MD_7	LSP1
0.00532963	0.311694	0.893	0.934	1	MD_7	UBC
0.00533656	0.511061	0.321	0.128	1	MD_7	EHMT1
0.00578074	0.53686	0.179	0.076	1	MD_7	ASPSCR1
0.00580396	0.470107	0.179	0.111	1	MD_7	CSNK1G3
0.00581995	0.423079	0.821	0.504	1	MD_7	SF1
0.00590143	0.451627	0.143	0.062	1	MD_7	TOPBP1
0.00592923	0.434834	1	0.998	1	MD_7	MALAT1
0.0059384	0.401684	0.321	0.087	1	MD_7	POP5
0.00598043	0.551499	0.429	0.243	1	MD_7	CLTC
0.00603191	0.402672	0.179	0.214	1	MD_7	USP16
0.00614055	0.485655	0.143	0.092	1	MD_7	CABIN1
0.00657081	0.600738	0.679	0.526	1	MD_7	MYADM
0.00662147	0.418365	0.179	0.053	1	MD_7	CBWD5
0.00707849	0.505058	0.143	0.113	1	MD_7	PBX2
0.00709644	0.430327	0.214	0.205	1	MD_7	DDX60L
0.00716976	0.299501	0.25	0.071	1	MD_7	ZNF33A
0.00733859	0.266234	0.143	0.227	1	MD_7	GNG2
0.00763739	0.465785	0.214	0.083	1	MD_7	CCDC25
0.00771593	0.379105	0.286	0.243	1	MD_7	ADRM1
0.00772794	0.317568	0.321	0.094	1	MD_7	YAF2
0.00780099	0.768501	0.107	0.024	1	MD_7	CXCR2
0.00780768	0.389205	0.286	0.241	1	MD_7	CCDC59
0.00791402	0.312276	0.107	0.05	1	MD_7	ZC3H3
0.00795342	0.375862	0.143	0.057	1	MD_7	SKI
0.00832983	0.421873	0.179	0.086	1	MD_7	CEP85L
0.00838168	0.465947	0.286	0.14	1	MD_7	ELOF1
0.00843002	0.454641	0.143	0.06	1	MD_7	TGS1
0.00856694	0.264839	0.464	0.562	1	MD_7	SELL
0.00864634	0.570441	0.643	0.473	1	MD_7	DDX17
0.00878913	0.593609	0.25	0.164	1	MD_7	SIRT7
0.0095951	0.406436	0.179	0.171	1	MD_7	LRP10
0.00972393	0.473096	0.143	0.052	1	MD_7	ARNTL
0.0099784	0.395238	0.179	0.026	1	MD_7	AC215522.1
0.0103997	0.571307	0.5	0.266	1	MD_7	JARID2
0.0104871	0.418428	0.464	0.183	1	MD_7	NCBP2-AS2
0.0107182	0.530203	0.286	0.158	1	MD_7	NSFL1C
0.0111782	0.322909	0.393	0.147	1	MD_7	STAC3
0.0122409	0.509947	0.25	0.09	1	MD_7	USP1
0.0127555	0.447231	0.214	0.119	1	MD_7	RPL26L1
0.0130303	0.296628	0.321	0.108	1	MD_7	TUBA1C
0.0142569	0.389048	0.5	0.436	1	MD_7	CNN2
0.0142774	0.342521	0.179	0.032	1	MD_7	NUAK2
0.0142857	0.485205	0.429	0.289	1	MD_7	MBP
0.0146169	0.316589	0.107	0.048	1	MD_7	NAA15
0.0151855	0.489416	0.25	0.106	1	MD_7	GNPTAB
0.0152331	0.385044	0.107	0.033	1	MD_7	CDK5RAP2
0.0158292	0.482709	0.107	0.014	1	MD_7	ABCG1
0.016686	0.578785	0.643	0.489	1	MD_7	TUBA1A
0.0174734	0.380034	0.143	0.051	1	MD_7	CA5B
0.0175	0.481023	0.75	0.579	1	MD_7	LILRB2
0.0176077	0.336217	0.143	0.029	1	MD_7	HCAR2
0.0176669	0.477868	0.143	0.042	1	MD_7	ARHGEF11
0.0181977	0.430455	0.179	0.092	1	MD_7	COASY
0.0184266	0.516227	0.357	0.191	1	MD_7	FNBP4
0.018626	0.394916	0.107	0.085	1	MD_7	XPC
0.0191461	0.392078	0.107	0.01	1	MD_7	AC005785.1
0.0198364	0.381408	0.429	0.379	1	MD_7	WSB1
0.0201128	0.344448	0.357	0.233	1	MD_7	IGF2R
0.0203004	0.520118	0.286	0.123	1	MD_7	SEC16A
0.020842	0.535602	0.107	0.024	1	MD_7	PTPRN2
0.0212907	0.311142	0.25	0.067	1	MD_7	TPK1
0.021527	0.430371	0.25	0.069	1	MD_7	TGIF1
0.021779	0.338457	0.179	0.128	1	MD_7	NRM
0.0222421	0.36949	1	0.999	1	MD_7	MT-RNR2
0.0226695	0.29733	0.25	0.089	1	MD_7	MYOF
0.0228018	0.414397	0.107	0.029	1	MD_7	PEX6
0.0228849	0.357557	0.25	0.076	1	MD_7	NUDT14
0.0231233	0.290255	0.107	0.021	1	MD_7	RAP2C-AS1
0.0233277	0.394247	0.143	0.138	1	MD_7	RSBN1L
0.0238508	0.430556	0.393	0.225	1	MD_7	PTEN
0.0243997	0.478568	0.179	0.085	1	MD_7	ARFIP1
0.0249275	0.516572	0.357	0.204	1	MD_7	CREBBP
0.0250056	0.414641	0.429	0.278	1	MD_7	PTPN18
0.0259187	0.512367	0.536	0.296	1	MD_7	ATP2B1
0.0262063	0.490438	0.536	0.281	1	MD_7	PKN2
0.02697	0.52677	0.143	0.033	1	MD_7	MT1E
0.0269701	0.31294	0.214	0.192	1	MD_7	CDIPT
0.0270416	0.428288	0.393	0.29	1	MD_7	NONO
0.0271736	0.32367	0.321	0.32	1	MD_7	SF3B6
0.0280146	0.393903	0.214	0.161	1	MD_7	PXK
0.0287303	0.390484	0.429	0.216	1	MD_7	SERTAD2
0.0288139	0.415635	0.214	0.083	1	MD_7	CCDC32
0.0290771	0.421318	0.25	0.088	1	MD_7	ING3
0.0299206	0.281004	0.107	0.074	1	MD_7	DPF2
0.0303907	0.465923	0.429	0.217	1	MD_7	STX16
0.0304582	0.352256	0.214	0.062	1	MD_7	TMEM150B
0.031683	0.570653	0.393	0.255	1	MD_7	MBOAT7
0.0321887	0.374922	0.179	0.086	1	MD_7	CCDC57
0.0324723	0.400025	0.821	0.654	1	MD_7	UBE2D3
0.0325288	0.368513	0.286	0.228	1	MD_7	TMED2
0.0330861	0.435716	0.536	0.394	1	MD_7	UXT
0.0338207	0.365056	0.107	0.049	1	MD_7	DNAJB2
0.0338359	0.430139	0.464	0.218	1	MD_7	RAD23B
0.0345079	0.344747	0.179	0.038	1	MD_7	BTBD19
0.0348905	0.325376	0.107	0.033	1	MD_7	PTRH1
0.0350637	0.458664	0.179	0.072	1	MD_7	TOP3A
0.0351644	0.33755	0.464	0.22	1	MD_7	TLE4
0.035542	0.416372	0.643	0.408	1	MD_7	RBM25
0.036431	0.379316	0.679	0.567	1	MD_7	CDA
0.0364534	0.394385	0.25	0.134	1	MD_7	GAPT
0.0365654	0.359567	0.179	0.132	1	MD_7	PEA15
0.0367831	0.309491	0.357	0.389	1	MD_7	TIMP2
0.0374896	0.272374	0.107	0.084	1	MD_7	VAMP7
0.0381021	0.439484	0.214	0.078	1	MD_7	STYX
0.0384236	0.520201	0.607	0.475	1	MD_7	SLC25A37
0.0386062	0.344035	0.393	0.388	1	MD_7	ADAR
0.0395371	0.447081	0.357	0.255	1	MD_7	TMEM154
0.0402333	0.335607	0.321	0.118	1	MD_7	SPINT2
0.0410743	0.347825	0.25	0.073	1	MD_7	RABGGTA
0.0419013	0.299284	0.214	0.065	1	MD_7	RNF4
0.0435739	0.294419	0.107	0.095	1	MD_7	SH3GL1
0.0440246	0.414339	0.393	0.215	1	MD_7	GSDMD
0.0442949	0.385162	0.143	0.132	1	MD_7	PHACTR1
0.0443239	0.328333	0.5	0.253	1	MD_7	SRSF10
0.0450366	0.401646	0.143	0.032	1	MD_7	PICK1
0.0453641	0.460008	0.179	0.079	1	MD_7	LTB
0.0457511	0.40476	0.179	0.08	1	MD_7	EZH1
0.0464681	0.47886	0.571	0.352	1	MD_7	JMJD1C
0.0471777	0.275125	0.321	0.14	1	MD_7	CDK11A
0.0472085	0.862618	0.143	0.068	1	MD_7	CMTM2
0.0477713	0.367462	0.214	0.058	1	MD_7	IKZF5
0.0488273	0.326337	0.5	0.254	1	MD_7	MANBA
0.0489904	0.346197	0.107	0.038	1	MD_7	ZBTB22
0.0490425	0.341025	0.214	0.187	1	MD_7	AZI2
0.0494764	0.440889	0.214	0.09	1	MD_7	PFKFB4
0.0497504	0.268804	0.179	0.042	1	MD_7	ENGASE
8.70812e-11	1.18747	0.9	0.527	3.42778e-06	HC_7	CD52
1.17606e-09	0.423674	0.467	0.082	4.62932e-05	HC_7	USP36
2.39529e-09	0.641222	1	0.936	9.42857e-05	HC_7	FOS
2.34922e-08	0.30999	1	0.998	0.000924722	HC_7	MALAT1
3.33599e-08	0.324182	0.5	0.148	0.00131315	HC_7	CPNE1
9.2529e-08	0.688972	0.967	0.797	0.00364222	HC_7	JUN
1.44262e-07	0.324808	0.367	0.077	0.00567859	HC_7	TSPYL2
1.64929e-07	0.303126	0.6	0.225	0.00649209	HC_7	RNF144B
3.30748e-07	0.808747	0.633	0.162	0.0130192	HC_7	Z93241
4.49528e-07	0.381793	0.967	0.921	0.0176948	HC_7	RPL29
8.90414e-07	0.535262	0.6	0.165	0.0350494	HC_7	RNF167
1.26514e-06	0.303437	0.267	0.048	0.0497998	HC_7	MPRIP
1.31277e-06	0.310238	0.967	0.943	0.0516744	HC_7	RPL10
1.98974e-06	0.325365	0.867	0.434	0.078322	HC_7	TMEM176B
2.01007e-06	0.56675	0.467	0.097	0.0791224	HC_7	TOB1
3.18915e-06	0.6845	0.733	0.276	0.125535	HC_7	WDR74
8.62761e-06	0.512691	1	0.729	0.339609	HC_7	CSF3R
1.51397e-05	0.569106	0.933	0.772	0.595946	HC_7	RPL26
1.68126e-05	0.321175	1	0.771	0.661793	HC_7	RPL5
1.6862e-05	0.381674	0.2	0.012	0.663737	HC_7	RNU5D-1
2.33327e-05	0.295715	0.333	0.077	0.918447	HC_7	ARHGEF10L
2.58361e-05	0.615664	0.433	0.092	1	HC_7	RF00003.10
2.6814e-05	0.39488	0.633	0.26	1	HC_7	TOP1
3.00554e-05	0.264333	0.433	0.142	1	HC_7	LINC00877
3.37522e-05	0.425766	1	0.889	1	HC_7	JUNB
3.78692e-05	0.31545	0.333	0.087	1	HC_7	AGO1
4.46901e-05	0.397388	0.967	0.6	1	HC_7	EEF1B2
4.59192e-05	0.572312	0.933	0.575	1	HC_7	ZFP36L2
4.63233e-05	0.37637	0.633	0.271	1	HC_7	MEF2C
6.02458e-05	0.326953	0.3	0.062	1	HC_7	HLA-DQA2
7.07067e-05	0.412167	0.467	0.134	1	HC_7	PPP1R10
8.04254e-05	0.474026	0.333	0.06	1	HC_7	PDPR
9.28031e-05	0.285939	0.533	0.218	1	HC_7	RNF114
0.000103813	0.29821	0.867	0.493	1	HC_7	PRRC2C
0.000113043	0.273631	0.3	0.079	1	HC_7	NKAPD1
0.000114148	0.342102	0.867	0.482	1	HC_7	UBB
0.00013167	0.650678	0.733	0.37	1	HC_7	AC109326
0.000140236	0.659416	0.733	0.369	1	HC_7	AC129492.3
0.000178347	0.321166	0.467	0.164	1	HC_7	PSMD2
0.000180858	0.315282	0.7	0.327	1	HC_7	AKNA
0.000185964	0.553765	0.733	0.334	1	HC_7	SNHG5
0.000186436	0.336023	0.933	0.576	1	HC_7	LILRB2
0.000192192	0.266411	0.7	0.423	1	HC_7	KTN1
0.000206653	0.302916	0.7	0.355	1	HC_7	ARHGEF1
0.00020986	0.265993	0.5	0.196	1	HC_7	ACIN1
0.000248631	0.321727	0.367	0.109	1	HC_7	ZC3H18
0.000276976	0.271968	0.233	0.047	1	HC_7	ANKHD1
0.000306398	0.286964	0.233	0.043	1	HC_7	GRASP
0.000309371	0.359442	0.3	0.06	1	HC_7	NAA16
0.000330774	0.458861	0.867	0.501	1	HC_7	RPL36A
0.000354747	0.30181	0.467	0.174	1	HC_7	POLR2A
0.000361792	0.302884	0.467	0.173	1	HC_7	MARK3
0.000370381	0.324156	0.6	0.294	1	HC_7	CALCOCO2
0.000371259	0.372397	0.3	0.061	1	HC_7	PID1
0.00037528	0.33715	0.867	0.502	1	HC_7	TRA2B
0.000397702	0.276519	0.233	0.045	1	HC_7	COG5
0.000444421	0.271428	0.2	0.035	1	HC_7	HIPK1-AS1
0.000465752	0.40484	0.3	0.059	1	HC_7	TOPBP1
0.000498662	0.318612	1	0.759	1	HC_7	DAZAP2
0.000531623	0.385986	0.733	0.361	1	HC_7	MYO9B
0.000597397	0.344132	0.5	0.189	1	HC_7	ZRANB2
0.000652107	0.323613	0.6	0.278	1	HC_7	RNASEK
0.000669719	0.379276	0.6	0.259	1	HC_7	SREK1
0.000675026	0.412451	0.967	0.788	1	HC_7	RPS29
0.000702882	0.298894	0.2	0.034	1	HC_7	PPFIBP2
0.000775672	0.309758	0.3	0.071	1	HC_7	TBC1D8
0.00078231	0.271542	0.533	0.237	1	HC_7	RC3H1
0.000800066	0.376368	1	0.928	1	HC_7	RPS27
0.000839231	0.285853	0.733	0.395	1	HC_7	SLC7A7
0.000847458	0.312179	0.333	0.092	1	HC_7	TOR1AIP2
0.000861962	0.361338	0.967	0.681	1	HC_7	TXNIP
0.000907629	0.455192	0.4	0.129	1	HC_7	SNN
0.000978649	0.314893	1	0.965	1	HC_7	EEF1A1
0.00100284	0.28701	0.367	0.127	1	HC_7	EHMT1
0.00101251	0.431721	0.7	0.338	1	HC_7	RSRP1
0.00101843	0.272851	0.6	0.287	1	HC_7	RELT
0.00104712	0.264188	1	0.765	1	HC_7	RPL4
0.00110249	0.263761	0.367	0.126	1	HC_7	SLC25A36
0.00112213	0.316605	0.567	0.259	1	HC_7	LSM4
0.00113745	0.369182	0.5	0.191	1	HC_7	YPEL2
0.00117737	0.535495	0.7	0.364	1	HC_7	IRAK3
0.00118821	0.281105	0.3	0.08	1	HC_7	ZCWPW2
0.00121865	0.332123	0.667	0.324	1	HC_7	RPL17
0.00123897	0.325828	0.4	0.139	1	HC_7	PSMA3
0.00124762	0.343815	0.4	0.139	1	HC_7	TBC1D22A
0.00124974	0.334864	0.667	0.332	1	HC_7	NDUFA6
0.00127381	0.342083	0.433	0.162	1	HC_7	ZNF281
0.00131883	0.474413	0.233	0.036	1	HC_7	ARL4C
0.0013393	0.384305	0.5	0.187	1	HC_7	ZFHX3
0.00135975	0.37048	0.267	0.049	1	HC_7	HERC2
0.00140419	0.370624	0.667	0.319	1	HC_7	CASP4
0.00144653	0.27359	0.2	0.029	1	HC_7	COG1
0.00147554	0.279659	0.533	0.249	1	HC_7	TAF15
0.0015203	0.305167	0.433	0.19	1	HC_7	RAB14
0.0015402	0.293126	0.6	0.282	1	HC_7	TSC22D4
0.00164684	0.271226	0.2	0.03	1	HC_7	CCDC137
0.00168505	0.410588	0.8	0.458	1	HC_7	GADD45B
0.00168566	0.511997	0.767	0.44	1	HC_7	PNISR
0.00168738	0.306711	0.567	0.281	1	HC_7	AKIRIN2
0.00174687	0.461826	0.833	0.526	1	HC_7	SARAF
0.00175005	0.293451	0.433	0.195	1	HC_7	CCDC12
0.00177036	0.376975	0.267	0.063	1	HC_7	ZNF787
0.00179882	0.396185	0.3	0.074	1	HC_7	NUDT2
0.00187837	0.484767	0.933	0.776	1	HC_7	FOSB
0.0018919	0.389122	0.433	0.151	1	HC_7	TMF1
0.0019324	0.383568	0.4	0.126	1	HC_7	DSTN
0.00194287	0.450914	0.567	0.254	1	HC_7	RAB11A
0.00196537	0.261496	0.467	0.207	1	HC_7	APP
0.00202788	0.287726	0.433	0.179	1	HC_7	ARL4A
0.00224097	0.266995	1	0.87	1	HC_7	MT-ND4L
0.00229732	0.264649	0.2	0.036	1	HC_7	SRM
0.00236353	0.363883	0.9	0.588	1	HC_7	HNRNPA1
0.00246245	0.276469	0.433	0.178	1	HC_7	ABHD5
0.00247586	0.291991	0.867	0.549	1	HC_7	ADGRE5
0.00248101	0.297111	0.7	0.427	1	HC_7	CDC37
0.00260367	0.360467	0.467	0.183	1	HC_7	COQ7
0.00265405	0.304089	0.233	0.044	1	HC_7	HDAC6
0.00267248	0.294182	0.9	0.596	1	HC_7	HMGN2
0.00268576	0.305933	0.3	0.077	1	HC_7	FEM1B
0.00279006	0.28686	0.467	0.212	1	HC_7	EIF4A1
0.00285216	0.304911	0.3	0.091	1	HC_7	RPL22P1
0.00311334	0.304896	1	0.864	1	HC_7	RPL15
0.00322025	0.372082	0.7	0.389	1	HC_7	PLXDC2
0.00332159	0.356666	0.267	0.061	1	HC_7	BAK1
0.0033304	0.267699	0.2	0.033	1	HC_7	MCU
0.00339724	0.330226	0.933	0.699	1	HC_7	HMGB1
0.00344682	0.265093	0.367	0.148	1	HC_7	MEF2D
0.00349327	0.307081	0.333	0.106	1	HC_7	ILKAP
0.00378482	0.269725	0.2	0.073	1	HC_7	ASL
0.00390991	0.441463	0.367	0.11	1	HC_7	CAPN7
0.0039373	0.284107	0.267	0.07	1	HC_7	TAF1
0.00395735	0.287849	0.733	0.414	1	HC_7	SRSF11
0.00407204	0.364405	0.367	0.121	1	HC_7	CUTALP
0.00416518	0.372868	0.867	0.564	1	HC_7	KLF4
0.00443158	0.332785	0.333	0.102	1	HC_7	MIA2
0.00465334	0.341168	0.667	0.347	1	HC_7	PRDX6
0.00471212	0.291649	0.4	0.162	1	HC_7	AMD1
0.00478872	0.346668	0.967	0.8	1	HC_7	RPL3
0.00492547	0.357216	0.467	0.185	1	HC_7	DPEP2
0.00500729	0.280648	0.267	0.07	1	HC_7	CHD6
0.00503226	0.267974	0.533	0.256	1	HC_7	SNORD3A
0.00504324	0.410198	0.233	0.045	1	HC_7	PTCH2
0.0050566	0.530027	0.7	0.377	1	HC_7	AC245014.1
0.00513804	0.373076	0.933	0.692	1	HC_7	YBX1
0.00536371	0.353345	0.5	0.212	1	HC_7	TMEM14C
0.00550278	0.338884	0.333	0.114	1	HC_7	ATP2A2
0.00561856	0.286697	0.467	0.209	1	HC_7	HMGN1
0.00568992	0.391265	0.5	0.215	1	HC_7	RNMT
0.00577	0.378214	0.133	0.013	1	HC_7	RNVU1-15
0.00589922	0.399785	0.9	0.628	1	HC_7	HNRNPU
0.00606354	0.271016	0.833	0.535	1	HC_7	NDUFA4
0.00621467	0.32702	0.233	0.061	1	HC_7	CRYBG3
0.00662536	0.380665	0.467	0.202	1	HC_7	CREBBP
0.00690743	0.318935	0.2	0.042	1	HC_7	PPP3CC
0.00709947	0.262077	0.667	0.375	1	HC_7	ACTN4
0.00717346	0.267305	0.333	0.119	1	HC_7	CCDC107
0.00725093	0.265828	0.233	0.051	1	HC_7	AC127502.1
0.0074642	0.29283	0.6	0.33	1	HC_7	ZC3H15
0.00820131	0.312456	0.8	0.573	1	HC_7	ACAP2
0.00828594	0.3523	0.533	0.255	1	HC_7	TET2
0.00885221	0.27575	0.233	0.058	1	HC_7	RUNX3
0.00934955	0.324384	0.833	0.585	1	HC_7	USP15
0.00935097	0.264304	0.4	0.182	1	HC_7	NDE1
0.00938982	0.295215	0.2	0.036	1	HC_7	RANGAP1
0.010124	0.303126	0.833	0.542	1	HC_7	HIF1A
0.01019	0.341192	0.533	0.255	1	HC_7	TUBB4B
0.010255	0.283842	0.233	0.06	1	HC_7	ARMCX3
0.010365	0.287588	0.433	0.189	1	HC_7	ERCC1
0.0106223	0.441088	0.467	0.193	1	HC_7	MGRN1
0.0107471	0.330713	0.433	0.184	1	HC_7	ROGDI
0.010782	0.406176	0.6	0.302	1	HC_7	YBX3
0.0110547	0.4416	0.433	0.172	1	HC_7	NECAP2
0.0113629	0.260978	0.8	0.523	1	HC_7	HNRNPDL
0.0113734	0.345351	0.133	0.035	1	HC_7	PPARGC1B
0.0114663	0.368899	0.3	0.096	1	HC_7	KLHL24
0.0117649	0.293367	0.333	0.112	1	HC_7	NT5C
0.0122295	0.371863	0.9	0.653	1	HC_7	POLR2L
0.0123446	0.332993	0.633	0.339	1	HC_7	SRSF7
0.0124691	0.264801	0.3	0.118	1	HC_7	NOTCH1
0.0126684	0.290961	0.333	0.137	1	HC_7	CHD8
0.01269	0.267851	0.533	0.288	1	HC_7	ACADVL
0.0130326	0.32065	0.733	0.501	1	HC_7	LRP1
0.0130945	0.342791	0.5	0.234	1	HC_7	LINC00937
0.01322	0.383312	0.533	0.266	1	HC_7	MID1IP1
0.013291	0.274152	0.2	0.044	1	HC_7	UBL4A
0.0133403	0.302917	0.2	0.04	1	HC_7	LINC00674
0.0138682	0.275103	0.167	0.027	1	HC_7	ZNF646
0.0139369	0.273788	0.3	0.116	1	HC_7	OIP5-AS1
0.0141693	0.275373	0.533	0.267	1	HC_7	NDUFA11
0.0142603	0.332178	0.167	0.03	1	HC_7	PRLR
0.0144584	0.30757	0.3	0.103	1	HC_7	H3F3AP4
0.0144672	0.269073	0.267	0.077	1	HC_7	BMF
0.0146016	0.27547	0.167	0.026	1	HC_7	FAM135A
0.0151653	0.350036	0.533	0.257	1	HC_7	CD4
0.0162345	0.356545	0.867	0.619	1	HC_7	ASAH1
0.0165218	0.283679	0.267	0.081	1	HC_7	GATAD1
0.0170342	0.285895	0.967	0.864	1	HC_7	RPS4X
0.0171541	0.280282	0.3	0.11	1	HC_7	SERTAD1
0.0175039	0.408065	0.833	0.617	1	HC_7	RPL23A
0.0175797	0.342594	0.567	0.294	1	HC_7	TUFM
0.0181423	0.332603	0.3	0.096	1	HC_7	DNPH1
0.0187475	0.271188	0.333	0.132	1	HC_7	XRN1
0.019249	0.285195	0.233	0.071	1	HC_7	RAB29
0.0194864	0.327949	0.533	0.269	1	HC_7	SRSF4
0.0206345	0.314169	0.367	0.143	1	HC_7	IL6ST
0.0207241	0.29579	0.567	0.301	1	HC_7	BOD1L1
0.0207318	0.277735	0.5	0.264	1	HC_7	SNRPF
0.0213717	0.262965	0.267	0.097	1	HC_7	PAGR1
0.0214758	0.324825	0.133	0.017	1	HC_7	RNVU1-6
0.0225165	0.341607	0.233	0.075	1	HC_7	SECISBP2L
0.0231528	0.338957	0.433	0.204	1	HC_7	DNAJA2
0.0234176	0.274914	0.2	0.049	1	HC_7	KLHDC2
0.0234384	0.37621	0.567	0.297	1	HC_7	MAN2B1
0.0238136	0.262224	0.233	0.063	1	HC_7	UTP23
0.0245905	0.292784	0.3	0.103	1	HC_7	RPL7L1
0.025267	0.304681	0.3	0.113	1	HC_7	LCOR
0.025583	0.286807	0.7	0.427	1	HC_7	CRTAP
0.0272224	0.269985	0.233	0.065	1	HC_7	CGAS
0.0273068	0.342399	0.567	0.299	1	HC_7	SHTN1
0.0274742	0.330625	0.867	0.642	1	HC_7	LIMD2
0.0281204	0.380263	0.633	0.365	1	HC_7	KMT2E
0.0281216	0.266059	0.2	0.055	1	HC_7	SMG6
0.0284525	0.331269	0.467	0.26	1	HC_7	RAB8A
0.0287802	0.38445	0.867	0.675	1	HC_7	RBM39
0.0288433	0.284412	0.7	0.429	1	HC_7	CELF2
0.0291546	0.285359	0.467	0.243	1	HC_7	HIPK3
0.0292325	0.2697	0.5	0.272	1	HC_7	MAP7D1
0.0292377	0.307599	0.4	0.174	1	HC_7	PCSK7
0.0303936	0.376316	0.267	0.099	1	HC_7	MSH3
0.0311508	0.288782	0.4	0.2	1	HC_7	ARHGEF40
0.0314573	0.357662	0.567	0.308	1	HC_7	VAMP2
0.0316052	0.26364	0.3	0.116	1	HC_7	ZMYM2
0.0318432	0.267658	0.3	0.124	1	HC_7	LINC00528
0.032669	0.439749	0.333	0.131	1	HC_7	VSTM1
0.0327314	0.262963	0.233	0.076	1	HC_7	ARMC8
0.0333127	0.293278	0.233	0.064	1	HC_7	MARCH5
0.0340177	0.320983	0.7	0.433	1	HC_7	CFP
0.0340554	0.265232	0.267	0.089	1	HC_7	DIPK2A
0.0351917	0.301685	0.233	0.076	1	HC_7	COL6A3
0.0353803	0.280029	0.367	0.159	1	HC_7	PPP4R3A
0.0373039	0.306851	0.267	0.088	1	HC_7	SLC30A7
0.0378028	0.293587	0.333	0.134	1	HC_7	PNP
0.0378896	0.361	0.267	0.092	1	HC_7	LMF2
0.0379405	0.328112	0.3	0.109	1	HC_7	CUL5
0.0384261	0.316208	0.933	0.766	1	HC_7	AHNAK
0.0384569	0.262362	0.667	0.412	1	HC_7	NDUFB4
0.0398982	0.329066	0.3	0.143	1	HC_7	PIEZO1
0.0403597	0.419891	0.3	0.123	1	HC_7	JDP2
0.0412185	0.318388	0.4	0.176	1	HC_7	RPS6KA3
0.0412693	0.288974	0.2	0.055	1	HC_7	KIF9
0.0414474	0.342022	0.6	0.352	1	HC_7	JMJD1C
0.0415921	0.285043	0.2	0.061	1	HC_7	AL669831.1
0.0426564	0.270085	0.533	0.296	1	HC_7	NAAA
0.0461986	0.274078	0.467	0.265	1	HC_7	TYK2
0.046291	0.296837	0.333	0.135	1	HC_7	SIRT2
0.0468084	0.36868	0.7	0.494	1	HC_7	APRT
0.0468607	0.337189	0.733	0.479	1	HC_7	RAB11FIP1
0.0484576	0.390076	0.367	0.174	1	HC_7	GOLGA4
0.0487037	0.324162	0.367	0.18	1	HC_7	SPAG7
0.0487761	0.276571	0.5	0.269	1	HC_7	IL6R
0.0491323	0.346639	0.467	0.238	1	HC_7	CDC40
7.27153e-27	1.16468	0.365	0.024	2.86229e-22	SD_7	CLU
2.26156e-14	0.486548	0.995	0.982	8.90219e-10	SD_7	NFKBIA
5.08826e-14	0.632762	0.806	0.663	2.00289e-09	SD_7	CTSD
1.02004e-12	0.83057	0.734	0.527	4.01519e-08	SD_7	CCL3
2.2421e-11	0.404803	0.865	0.882	8.82557e-07	SD_7	RPS26
2.59268e-09	0.576527	0.509	0.302	0.000102056	SD_7	VAMP5
3.37752e-09	0.293965	0.818	0.822	0.000132949	SD_7	PYCARD
4.06963e-09	0.282751	0.874	0.852	0.000160193	SD_7	MNDA
1.34838e-08	0.513855	0.828	0.704	0.000530763	SD_7	IFITM3
4.41237e-08	0.76962	0.415	0.254	0.00173684	SD_7	CCL3L1
8.10137e-08	0.345136	0.91	0.87	0.00318894	SD_7	CYBA
3.86377e-07	0.307348	0.915	0.893	0.015209	SD_7	NFKBIZ
6.61478e-07	0.332568	0.691	0.645	0.0260378	SD_7	C4orf48
1.92679e-06	0.43941	0.348	0.302	0.0758444	SD_7	APOBEC3A
4.03451e-06	0.79193	0.403	0.219	0.158811	SD_7	CCL4
9.42899e-06	0.312517	0.999	1	0.371153	SD_7	S100A8
1.25208e-05	0.317747	0.687	0.621	0.492855	SD_7	RAC1
1.29649e-05	0.396865	0.948	0.929	0.510339	SD_7	IER2
2.69519e-05	0.314104	0.912	0.852	1	SD_7	TNFAIP3
3.28324e-05	0.403905	0.838	0.722	1	SD_7	CXCL8
5.35857e-05	0.283924	0.765	0.71	1	SD_7	ATP6V0E1
5.42821e-05	0.327707	0.341	0.266	1	SD_7	RNPEPL1
6.17173e-05	0.263507	0.917	0.911	1	SD_7	TYMP
7.00142e-05	0.279851	0.925	0.893	1	SD_7	LGALS1
0.000157313	0.270149	0.893	0.888	1	SD_7	ATP2B1-AS1
0.000299407	0.37176	0.41	0.29	1	SD_7	TNFSF10
0.000305406	0.309076	0.558	0.509	1	SD_7	NCF1C
0.00031057	0.278272	0.67	0.604	1	SD_7	FPR1
0.000475287	0.292249	0.567	0.473	1	SD_7	PTPN6
0.000484912	0.275885	0.228	0.136	1	SD_7	NOSIP
0.000628613	0.394338	0.655	0.556	1	SD_7	H1FX
0.000715339	0.335994	0.385	0.314	1	SD_7	PLAC8
0.00102348	0.316853	0.233	0.154	1	SD_7	TMEM91
0.00119092	0.263212	0.194	0.13	1	SD_7	AC087239
0.0018666	0.290557	0.192	0.089	1	SD_7	GIMAP7
0.00193359	0.316677	0.416	0.29	1	SD_7	BLOC1S1
0.00268948	0.453027	0.217	0.112	1	SD_7	PPBP
0.00288251	0.306442	0.435	0.314	1	SD_7	SELPLG
0.00407232	0.262852	0.793	0.781	1	SD_7	NAMPT
0.00453841	0.303246	0.608	0.538	1	SD_7	NLRP3
0.00481698	0.278961	0.533	0.462	1	SD_7	CEBPD
0.0052178	0.285906	0.183	0.124	1	SD_7	IFI44L
0.0162574	0.299409	0.348	0.272	1	SD_7	ISG15
0.0167668	0.274717	0.501	0.473	1	SD_7	LY6E
0.0335418	0.295366	0.251	0.154	1	SD_7	CXCL2
1.26774e-18	1.02995	0.692	0.303	4.9902e-14	SDR_7	RETN
6.65681e-17	0.852227	0.798	0.469	2.62032e-12	SDR_7	HLA-DRB5
1.81792e-15	0.892502	0.394	0.27	7.15586e-11	SDR_7	HSPA5
4.41711e-13	0.60555	0.808	0.527	1.73871e-08	SDR_7	AP1S2
1.27779e-10	0.394496	0.971	0.743	5.02975e-06	SDR_7	LSP1
1.23358e-09	0.312683	0.971	0.866	4.85575e-05	SDR_7	MT-ND4L
6.15888e-09	0.599956	0.24	0.055	0.000242432	SDR_7	HLA-DQA2
1.55424e-08	0.468802	0.644	0.335	0.000611796	SDR_7	TMEM176A
3.99162e-08	0.267054	0.106	0.006	0.00157122	SDR_7	OLFM1
4.29353e-08	0.505356	0.654	0.377	0.00169006	SDR_7	UBE2D1
9.72033e-08	0.516864	0.596	0.329	0.00382621	SDR_7	FOLR3
1.20903e-07	0.522177	0.221	0.054	0.00475912	SDR_7	HLA-DQA1
1.23156e-07	0.419804	0.875	0.818	0.00484779	SDR_7	CD44
1.7635e-07	0.431231	0.875	0.742	0.00694167	SDR_7	IFNGR2
6.24875e-07	0.338688	0.99	0.929	0.024597	SDR_7	H3F3B
3.44389e-06	0.269823	0.99	0.964	0.135562	SDR_7	EEF1A1
3.98328e-06	0.335616	0.212	0.058	0.156794	SDR_7	ADK
4.30443e-06	0.477867	0.76	0.587	0.169435	SDR_7	MARCKS
4.81904e-06	0.491391	0.279	0.184	0.189692	SDR_7	DDIT4
8.39855e-06	0.426207	0.596	0.356	0.330592	SDR_7	PPIF
1.16905e-05	0.408976	0.365	0.207	0.460174	SDR_7	TMEM14C
3.28686e-05	0.401285	0.731	0.515	1	SDR_7	MYADM
4.09436e-05	0.276976	0.673	0.806	1	SDR_7	IL1B
6.17197e-05	0.284526	0.904	0.863	1	SDR_7	RPS4X
6.23841e-05	0.27385	0.192	0.054	1	SDR_7	PIK3C2A
6.9393e-05	0.399262	0.5	0.326	1	SDR_7	PPP1R2
7.75108e-05	0.336269	0.327	0.143	1	SDR_7	ALDH1A1
9.43635e-05	0.371924	0.5	0.284	1	SDR_7	NBPF10
0.00011373	0.714356	0.5	0.483	1	SDR_7	MT2A
0.000121254	0.335316	0.99	0.95	1	SDR_7	CD74
0.000159043	0.366312	0.375	0.186	1	SDR_7	MGRN1
0.000232494	0.332384	0.394	0.215	1	SDR_7	GNG2
0.000248097	0.40482	0.885	0.778	1	SDR_7	HLA-DRA
0.000259692	0.386458	0.529	0.345	1	SDR_7	GPCPD1
0.000268315	0.353822	0.192	0.067	1	SDR_7	RLF
0.000271019	0.260199	0.846	0.657	1	SDR_7	IQGAP1
0.000290964	0.363337	0.192	0.075	1	SDR_7	DYNLT3
0.000301184	0.337418	0.471	0.266	1	SDR_7	HLA-DRB6
0.000321802	0.309782	0.644	0.433	1	SDR_7	SLC25A5
0.000335012	0.278436	0.106	0.037	1	SDR_7	RNF125
0.000363877	0.324453	0.74	0.616	1	SDR_7	STK17B
0.000410922	0.484827	0.442	0.261	1	SDR_7	THBS1
0.0004378	0.283735	0.106	0.079	1	SDR_7	AC012368.1
0.000500859	0.318676	0.635	0.43	1	SDR_7	TMEM176B
0.000565122	0.344756	0.5	0.312	1	SDR_7	HLA-DQB1
0.000674469	0.262339	0.75	0.638	1	SDR_7	NINJ1
0.000874068	0.282583	0.712	0.522	1	SDR_7	CD52
0.00100475	0.301248	0.346	0.193	1	SDR_7	CCT6A
0.00120829	0.286673	0.423	0.239	1	SDR_7	RPS2P5
0.00137293	0.340367	0.173	0.092	1	SDR_7	MTSS1
0.00147109	0.282986	0.529	0.339	1	SDR_7	CALHM6
0.00172222	0.295584	0.192	0.117	1	SDR_7	ZC3H13
0.00177723	0.433787	0.5	0.411	1	SDR_7	HLA-DPB1
0.0019204	0.297283	0.625	0.455	1	SDR_7	EIF3E
0.00202806	0.416765	0.567	0.471	1	SDR_7	HLA-DPA1
0.00261815	0.309752	0.192	0.101	1	SDR_7	PFDN1
0.00286691	0.286438	0.606	0.423	1	SDR_7	CMTM6
0.00341405	0.312948	0.769	0.696	1	SDR_7	DUSP6
0.00423217	0.357201	0.279	0.186	1	SDR_7	SERPINB9
0.00470111	0.297214	0.673	0.514	1	SDR_7	CDC42EP3
0.0049204	0.288567	0.577	0.406	1	SDR_7	IL10RA
0.00492698	0.264472	0.202	0.146	1	SDR_7	CD68
0.00537159	0.309517	0.423	0.267	1	SDR_7	WAC
0.00664979	0.261704	0.163	0.065	1	SDR_7	PITPNB
0.00803141	0.307427	0.788	0.665	1	SDR_7	TAGLN2
0.00843922	0.290455	0.837	0.743	1	SDR_7	TNFAIP2
0.00850227	0.267604	0.452	0.32	1	SDR_7	RIOK3
0.0100253	0.279962	0.269	0.15	1	SDR_7	MTND2P28
0.0119313	0.341142	0.481	0.335	1	SDR_7	LITAF
0.0120819	0.261247	0.673	0.539	1	SDR_7	RBM3
0.0124792	0.260472	0.673	0.602	1	SDR_7	EEF1B2
0.0134238	0.261289	0.106	0.038	1	SDR_7	C15orf48
0.014482	0.268531	0.308	0.181	1	SDR_7	GNAI3
0.0145232	0.265161	0.298	0.166	1	SDR_7	TMEM30A
0.0155978	0.294665	0.24	0.133	1	SDR_7	ABCA1
0.0167765	0.328303	0.452	0.307	1	SDR_7	EHD1
0.0172795	0.281973	0.337	0.215	1	SDR_7	PELI1
0.0181874	0.299815	0.413	0.292	1	SDR_7	ATP2B1
0.0244188	0.296695	0.365	0.253	1	SDR_7	CTNNB1
0.0310044	0.282106	0.356	0.224	1	SDR_7	RGCC
0.0337037	0.260714	0.317	0.214	1	SDR_7	LSM14A
0.0468182	0.263688	0.423	0.31	1	SDR_7	VPS13C

## Sheet: HC AS MD SD SDR-T12
p_val	avg_logFC	pct.1	pct.2	p_val_adj	cluster	gene
9.46185e-32	0.701418	0.779	0.536	3.72447e-27	AS_12	RPS2P5
5.36938e-13	0.409364	0.834	0.732	2.11355e-08	AS_12	RPL36A
5.16337e-12	0.324281	0.969	0.954	2.03246e-07	AS_12	RPL23A
7.42805e-12	0.342986	0.988	0.953	2.9239e-07	AS_12	RPL26
2.55051e-08	0.261581	0.982	0.954	0.00100396	AS_12	RPL38
2.98614e-08	0.36995	0.62	0.462	0.00117544	AS_12	AC024293
2.56933e-07	0.27167	0.939	0.877	0.0101136	AS_12	RPS20
2.65212e-07	0.351263	0.552	0.422	0.0104396	AS_12	GIMAP4
5.96389e-07	0.310591	0.448	0.358	0.0234757	AS_12	PSIP1
1.1797e-06	0.269952	0.521	0.468	0.0464367	AS_12	RESF1
1.51575e-06	0.372882	0.399	0.304	0.0596646	AS_12	FCGR3A
3.3834e-06	0.264546	0.362	0.276	0.133181	AS_12	MRPL33
4.186e-06	0.286023	0.54	0.453	0.164773	AS_12	GCC2
6.84236e-06	0.319317	0.712	0.599	0.269336	AS_12	GIMAP7
1.8049e-05	0.293403	0.276	0.21	0.710464	AS_12	HLA-DQB1
2.70473e-05	0.268062	0.252	0.172	1	AS_12	RPS10
4.44565e-05	0.284891	0.344	0.226	1	AS_12	CYTOR
0.000187321	0.303873	0.718	0.644	1	AS_12	MT-ND6
0.000292874	0.266658	0.344	0.237	1	AS_12	PRNP
0.000506557	0.309143	0.583	0.521	1	AS_12	GZMB
0.001614	0.287298	0.534	0.464	1	AS_12	HLA-DRB1
0.00188586	0.364707	0.221	0.12	1	AS_12	TRGV10
0.00195405	0.266397	0.276	0.166	1	AS_12	TRGC2
0.00288003	0.287169	0.35	0.299	1	AS_12	CCL4
0.00748511	0.305541	0.718	0.62	1	AS_12	IL7R
2.00287e-43	0.78104	0.972	0.909	7.8839e-39	MD_12	RPS26
9.62056e-17	0.407344	0.969	0.914	3.78694e-12	MD_12	TSC22D3
1.20735e-14	0.309998	0.208	0.139	4.7525e-10	MD_12	CDK6
4.24694e-11	0.37363	0.15	0.038	1.67172e-06	MD_12	IFI44L
3.5134e-09	0.280973	0.331	0.238	0.000138298	MD_12	TOB1
4.00572e-09	0.297249	0.247	0.126	0.000157677	MD_12	PRSS30P
4.09201e-09	0.328968	0.131	0.046	0.000161074	MD_12	ANKRD20A11P
4.58398e-09	0.313965	0.856	0.781	0.000180439	MD_12	PPP1R15A
7.33654e-07	0.423153	0.55	0.403	0.0288788	MD_12	TYROBP
1.02414e-05	0.301814	0.497	0.445	0.403133	MD_12	FGFBP2
0.000120491	0.268542	0.219	0.13	1	MD_12	MTND2P28
0.000173291	0.269999	0.419	0.353	1	MD_12	SPON2
1.18749e-09	0.376256	0.202	0.085	4.67432e-05	HC_12	RPL13P12
6.40584e-42	0.796401	0.931	0.35	2.52153e-37	SD_12	RPS4Y1
2.91418e-13	0.510414	0.931	0.872	1.14711e-08	SD_12	MT-ATP8
4.63024e-07	0.400605	0.917	0.826	0.018226	SD_12	DUSP1
7.3467e-07	0.275122	0.236	0.085	0.0289188	SD_12	TXLNGY
8.4783e-07	0.291262	0.243	0.083	0.0333731	SD_12	USP9Y
2.89158e-06	0.317133	0.271	0.116	0.113821	SD_12	SSBP4
3.95021e-06	0.323393	0.243	0.084	0.155492	SD_12	DDX3Y
0.000118547	0.333856	0.507	0.317	1	SD_12	FOSB
0.000198822	0.260808	0.625	0.552	1	SD_12	PLAC8
0.000276859	0.27722	0.208	0.083	1	SD_12	UTY
0.000941682	0.347678	0.757	0.639	1	SD_12	FOS
0.000995326	0.266008	0.812	0.67	1	SD_12	IER2
0.00126805	0.281908	0.562	0.397	1	SD_12	CXCR4
0.00141212	0.293886	0.528	0.366	1	SD_12	AC109326
0.00266014	0.260347	0.931	0.88	1	SD_12	JUN
0.0202778	0.301143	0.139	0.064	1	SD_12	TRGV2
1.83556e-11	0.471112	0.321	0.107	7.22531e-07	SD_R_12	HLA-DQA2
1.16613e-09	0.285496	0.959	0.812	4.59025e-05	SD_R_12	ZFP36L2
5.73744e-09	0.448176	0.52	0.347	0.000225843	SD_R_12	IL2RB
2.91497e-08	0.349431	0.944	0.817	0.00114742	SD_R_12	DUSP1
3.17772e-08	0.398901	0.296	0.121	0.00125085	SD_R_12	FCER1G
4.15041e-08	0.32096	0.995	0.93	0.00163373	SD_R_12	CD74
2.82947e-07	0.31053	0.163	0.044	0.0111376	SD_R_12	LAT2
3.81727e-05	0.336849	0.423	0.255	1	SD_R_12	HLA-DRA
5.47927e-05	0.306549	0.663	0.487	1	SD_R_12	CMC1
9.41885e-05	0.39442	0.796	0.728	1	SD_R_12	GNLY
0.000116647	0.333213	0.546	0.38	1	SD_R_12	SELL
0.000332565	0.304742	0.577	0.417	1	SD_R_12	DUSP2
0.000521858	0.287465	0.709	0.562	1	SD_R_12	GZMK
0.000752578	0.323271	0.286	0.165	1	SD_R_12	XCL1
0.000853194	0.276776	0.413	0.271	1	SD_R_12	MAP3K8
0.0105717	0.285638	0.546	0.426	1	SD_R_12	TYROBP

## Sheet: HC AS MD SD SDR-DC6
p_val	avg_logFC	pct.1	pct.2	p_val_adj	cluster	gene
1.0231e-12	0.519626	1	1	4.02721e-08	AS_6	RPL37
1.36447e-11	0.471342	1	1	5.37095e-07	AS_6	RPL37A
4.25963e-10	0.439135	0.208	0.211	1.67672e-05	AS_6	COA1
1.58456e-08	0.534887	1	0.987	0.000623731	AS_6	RPS29
3.39768e-08	0.408128	1	0.996	0.00133743	AS_6	RPL39
1.47233e-07	0.309454	1	1	0.00579554	AS_6	RPS27
4.44033e-06	0.360098	0.375	0.358	0.174785	AS_6	RPS10
8.85281e-06	0.276099	1	1	0.348473	AS_6	RPL41
1.4595e-05	0.331438	0.292	0.194	0.574502	AS_6	RPL22P1
2.22812e-05	0.326654	0.292	0.112	0.877055	AS_6	MRPS18A
3.34083e-05	0.481196	0.542	0.392	1	AS_6	SHOC2
4.37673e-05	0.414594	0.5	0.539	1	AS_6	BDP1
7.13653e-05	0.309959	1	1	1	AS_6	RPS28
8.01211e-05	0.341506	1	1	1	AS_6	RPS21
0.000202211	0.476091	1	0.966	1	AS_6	RPL26
0.000245029	0.474742	1	0.858	1	AS_6	RPL36A
0.000266341	0.284792	1	0.996	1	AS_6	RPL35
0.000301667	0.480181	0.625	0.216	1	AS_6	MRPS18B
0.000337889	0.369855	0.167	0.151	1	AS_6	CYB5D2
0.000376723	0.348388	1	0.996	1	AS_6	RPL21
0.00040548	0.287328	0.375	0.345	1	AS_6	MZT2A
0.000445275	0.297475	1	0.996	1	AS_6	RPL36
0.000524509	0.385635	0.625	0.259	1	AS_6	TTC1
0.000736014	0.447969	0.917	0.724	1	AS_6	RPL22
0.000776972	0.386697	1	0.978	1	AS_6	RPL38
0.000782346	0.286147	1	1	1	AS_6	RPS2
0.000968323	0.287414	0.583	0.556	1	AS_6	PSENEN
0.000971757	0.346465	0.333	0.125	1	AS_6	NR2C2
0.00099674	0.292713	0.625	0.664	1	AS_6	RSL24D1
0.00112811	0.33441	0.25	0.095	1	AS_6	THOC1
0.00141469	0.33394	0.792	0.802	1	AS_6	SERBP1
0.00158236	0.326949	0.25	0.138	1	AS_6	NCBP1
0.00164782	0.387269	1	0.983	1	AS_6	RPS20
0.00164947	0.28262	1	0.97	1	AS_6	RPL23A
0.00180103	0.357934	0.542	0.448	1	AS_6	SRSF9
0.00193208	0.605378	0.917	0.797	1	AS_6	HLA-DQB1
0.00194353	0.624525	0.583	0.297	1	AS_6	RPS4Y1
0.0021554	0.303296	0.5	0.418	1	AS_6	SRP9
0.00221812	0.27533	0.25	0.103	1	AS_6	SMC2
0.00235692	0.271335	0.583	0.297	1	AS_6	RASA4
0.00326749	0.35883	0.458	0.25	1	AS_6	TIA1
0.00364999	0.405323	0.875	0.716	1	AS_6	C8orf59
0.00395188	0.326658	0.5	0.418	1	AS_6	SMARCC2
0.00403339	0.368508	0.917	0.884	1	AS_6	ATP5MC3
0.00433836	0.282248	0.292	0.151	1	AS_6	SMAD3
0.00442562	0.30913	0.375	0.207	1	AS_6	NPRL3
0.00446489	0.337271	1	0.871	1	AS_6	ANAPC16
0.00501944	0.406547	0.583	0.272	1	AS_6	CRLF3
0.00502215	0.480215	0.125	0.086	1	AS_6	PF4
0.00532345	0.283012	0.625	0.552	1	AS_6	COPS9
0.00558121	0.433506	0.583	0.332	1	AS_6	MTIF3
0.00650733	0.287965	0.417	0.353	1	AS_6	PRPF6
0.00723451	0.269858	0.25	0.052	1	AS_6	SPRYD7
0.00826745	0.3241	0.5	0.228	1	AS_6	TTC39A
0.00840425	0.302689	0.417	0.293	1	AS_6	GINM1
0.00929343	0.304205	0.333	0.112	1	AS_6	ZNF609
0.00940203	0.315351	0.375	0.198	1	AS_6	FAM200B
0.00977049	0.350041	0.292	0.086	1	AS_6	RUSC1
0.00984569	0.374682	0.583	0.47	1	AS_6	BOD1L1
0.0114359	0.296279	0.542	0.5	1	AS_6	FEZ2
0.011651	0.313474	0.667	0.53	1	AS_6	DENR
0.0137637	0.270386	0.167	0.056	1	AS_6	AGK
0.0142312	0.298316	1	0.996	1	AS_6	MT-ND3
0.0144192	0.321722	0.375	0.147	1	AS_6	RNF220
0.014468	0.299754	0.375	0.28	1	AS_6	DOCK10
0.0150635	0.291349	0.5	0.401	1	AS_6	PPCS
0.0156947	0.394468	0.833	0.647	1	AS_6	AC024293
0.0159326	0.312483	0.542	0.422	1	AS_6	AP3B1
0.0161821	0.363214	0.625	0.358	1	AS_6	AZIN1
0.0162592	0.324785	0.75	0.522	1	AS_6	LAMTOR2
0.0170058	0.344797	0.333	0.129	1	AS_6	DUSP23
0.0177516	0.281814	0.292	0.211	1	AS_6	STX12
0.017922	0.283407	0.292	0.159	1	AS_6	USP39
0.0182171	0.269677	0.375	0.28	1	AS_6	PUM2
0.0183746	0.726512	0.458	0.353	1	AS_6	AL139020
0.0195077	0.319697	0.333	0.164	1	AS_6	IL18
0.0207437	0.287446	0.458	0.345	1	AS_6	RNF167
0.0209825	0.282458	0.75	0.466	1	AS_6	MAN1A2
0.0213379	0.400263	0.5	0.267	1	AS_6	AC011893
0.0213476	0.296267	0.542	0.267	1	AS_6	RBM47
0.0218692	0.278489	0.875	0.776	1	AS_6	SMDT1
0.0221067	0.289621	1	0.892	1	AS_6	ARGLU1
0.0222581	0.27948	0.5	0.371	1	AS_6	RAB10
0.0257712	0.325963	0.75	0.642	1	AS_6	NDUFA3
0.0260069	0.279831	1	0.991	1	AS_6	RPL27A
0.026315	0.316297	0.583	0.422	1	AS_6	SNRPE
0.0263464	0.282944	0.292	0.116	1	AS_6	DNAJA3
0.0289629	0.28439	0.5	0.414	1	AS_6	SLC25A36
0.0308449	0.335749	1	0.884	1	AS_6	AC245014.1
0.0309025	0.277283	0.25	0.108	1	AS_6	GMPPA
0.03097	0.263873	0.292	0.108	1	AS_6	CD180
0.0319575	0.292361	0.458	0.401	1	AS_6	GOLGB1
0.0321363	0.340951	0.792	0.625	1	AS_6	SEM1
0.0332671	0.319403	0.25	0.065	1	AS_6	SLC16A1-AS1
0.0334411	0.324077	0.792	0.578	1	AS_6	ITPR2
0.0336955	0.333488	0.292	0.155	1	AS_6	ANKRD26
0.0347191	0.285177	0.75	0.737	1	AS_6	ZRANB2
0.0359621	0.28207	0.5	0.319	1	AS_6	PFDN6
0.0383922	0.268294	0.833	0.741	1	AS_6	DDX24
0.0416856	0.270487	0.333	0.142	1	AS_6	TMEM53
0.0417019	0.263795	0.292	0.086	1	AS_6	SPNS1
0.0417237	0.309567	0.958	0.935	1	AS_6	TMEM258
0.0439707	0.340533	0.458	0.233	1	AS_6	MGLL
0.0442017	0.264471	0.333	0.121	1	AS_6	NRBF2
0.0454616	0.381223	0.833	0.698	1	AS_6	RPS2P5
0.0463276	0.296866	0.708	0.522	1	AS_6	SMARCA5
0.0469081	0.336421	0.583	0.457	1	AS_6	SHTN1
0.0481837	0.265975	0.292	0.155	1	AS_6	PEX11B
1.1356e-09	0.314343	0.348	0.314	4.47006e-05	MD_6	IFITM3
1.79081e-08	1.10556	0.13	0.114	0.000704917	MD_6	LYZ
7.03893e-07	1.05918	0.109	0.095	0.0277073	MD_6	S100A9
2.48707e-06	0.572651	0.457	0.281	0.0978987	MD_6	IFI44L
5.26549e-06	1.09542	0.13	0.09	0.207265	MD_6	S100A8
8.45586e-06	0.341678	0.391	0.205	0.332848	MD_6	PLSCR1
8.6523e-06	0.390448	0.609	0.452	0.34058	MD_6	GAS6
9.22498e-06	0.327391	0.435	0.281	0.363123	MD_6	CSNK1E
5.1184e-05	0.572207	0.435	0.205	1	MD_6	LY6E
9.95393e-05	0.305522	0.348	0.29	1	MD_6	IFIT2
0.000306489	0.467782	0.783	0.61	1	MD_6	MX1
0.000376606	0.364345	0.152	0.005	1	MD_6	IFI6
0.000425593	0.274831	0.522	0.271	1	MD_6	DENND4B
0.00056437	0.262132	0.304	0.067	1	MD_6	SAMD9L
0.000758654	0.372823	0.717	0.481	1	MD_6	TNFSF13B
0.00119934	0.260857	0.326	0.09	1	MD_6	IFI44
0.00132268	0.280231	1	0.971	1	MD_6	UBB
0.00210611	0.289506	0.391	0.21	1	MD_6	TAF9
0.00217664	0.265102	0.609	0.314	1	MD_6	TEP1
0.00234525	0.31773	0.435	0.271	1	MD_6	MYO1F
0.00373295	0.36089	0.891	0.762	1	MD_6	ZFP36
0.00411555	0.315209	0.761	0.562	1	MD_6	TCIRG1
0.00430643	0.294775	0.348	0.114	1	MD_6	ZNF331
0.00476699	0.29373	0.609	0.414	1	MD_6	ATF4
0.00649477	0.299152	0.435	0.19	1	MD_6	MED1
0.00690327	0.279458	0.565	0.367	1	MD_6	SDF4
0.0080272	0.347903	0.913	0.757	1	MD_6	S100A11
0.00996378	0.265689	1	0.995	1	MD_6	HLA-B
0.010288	0.325489	0.848	0.676	1	MD_6	SP110
0.0116459	0.323576	0.283	0.105	1	MD_6	ISG15
0.0119137	0.363307	0.826	0.624	1	MD_6	NFKBIA
0.0150473	0.300538	1	0.971	1	MD_6	RPS26
0.0175893	0.332556	0.522	0.286	1	MD_6	COL26A1
0.0179366	0.262739	0.63	0.405	1	MD_6	MRPL43
0.0235155	0.264128	0.543	0.471	1	MD_6	STXBP2
0.0247894	0.287277	0.87	0.686	1	MD_6	GADD45B
0.0399942	0.261208	0.565	0.371	1	MD_6	CHMP5
0.0424125	0.260521	0.304	0.129	1	MD_6	RLIM
0.0438201	0.291278	0.87	0.748	1	MD_6	LTB
0.0499139	0.269247	0.739	0.552	1	MD_6	NCF1
1.00778e-05	0.467687	0.565	0.34	0.396694	HC_6	SNORD3A
2.78297e-05	0.306406	0.948	0.851	1	HC_6	GRB2
0.00028991	0.366691	0.574	0.34	1	HC_6	FAM118A
0.000771981	0.408497	0.774	0.738	1	HC_6	TSPYL2
0.0010682	0.305342	0.539	0.362	1	HC_6	ATXN7L3B
0.00139675	0.389309	0.913	0.801	1	HC_6	JUN
0.00193065	0.288498	0.383	0.234	1	HC_6	CDH23
0.00194162	0.292289	0.922	0.801	1	HC_6	CD4
0.00336612	0.284931	0.417	0.248	1	HC_6	STAG3L3
0.00343423	0.347095	0.322	0.163	1	HC_6	CRYM
0.0042961	0.359255	0.33	0.199	1	HC_6	RPL13P12
0.00820585	0.31168	0.391	0.227	1	HC_6	AC245060.2
0.00903537	0.271827	0.296	0.156	1	HC_6	LCNL1
0.0187504	0.279741	0.487	0.298	1	HC_6	HIST1H1C
0.0216394	0.313315	0.8	0.73	1	HC_6	NBPF10
0.0330294	0.26438	0.704	0.681	1	HC_6	IRF4
4.15372e-08	0.917826	1	0.884	0.00163503	SD_6	MT-ATP8
4.75393e-06	0.262164	0.75	0.315	0.187129	SD_6	RNF167
5.40406e-05	0.278259	0.583	0.194	1	SD_6	ZBTB44
0.000177849	0.340409	0.25	0.06	1	SD_6	CLEC4A
0.00040831	0.412797	0.792	0.552	1	SD_6	ATP13A2
0.000450361	0.307612	0.208	0.026	1	SD_6	AC005070
0.000527048	0.404492	0.542	0.332	1	SD_6	RFTN1
0.000572241	0.355718	0.5	0.297	1	SD_6	ICAM3
0.000754882	0.334854	0.667	0.634	1	SD_6	SNHG1
0.000786165	0.544132	0.542	0.198	1	SD_6	GLUL
0.000848043	0.45076	0.917	0.629	1	SD_6	CRIP1
0.00136824	0.415298	0.667	0.44	1	SD_6	NOTCH2
0.00146833	0.2728	0.375	0.095	1	SD_6	GLRX5
0.00148899	0.277805	0.375	0.125	1	SD_6	SAE1
0.00185822	0.535835	0.917	0.625	1	SD_6	DDIT4
0.00193887	0.273879	0.375	0.198	1	SD_6	ATG4D
0.00197267	0.416324	0.875	0.797	1	SD_6	HNRNPA3
0.00218446	0.293586	1	0.853	1	SD_6	TPM2
0.00245141	0.353529	0.667	0.414	1	SD_6	ANKRD10
0.00250512	0.31175	0.375	0.194	1	SD_6	UHRF2
0.00258593	0.355965	0.875	0.569	1	SD_6	C1orf43
0.00259939	0.365952	0.917	0.578	1	SD_6	DNAJC3
0.00270722	0.312174	0.375	0.319	1	SD_6	RALBP1
0.00280187	0.390445	0.625	0.246	1	SD_6	SRP54
0.00287731	0.426599	0.75	0.401	1	SD_6	LNPEP
0.0032105	0.260664	0.792	0.422	1	SD_6	IL10RA
0.00337794	0.337278	0.25	0.078	1	SD_6	EPC2
0.00347275	0.35981	0.458	0.142	1	SD_6	GMDS
0.00400927	0.363114	0.583	0.375	1	SD_6	CELF1
0.00429708	0.37403	0.5	0.159	1	SD_6	AASDHPPT
0.00445884	0.362527	0.5	0.246	1	SD_6	ZFYVE26
0.00479943	0.267814	0.375	0.263	1	SD_6	GCA
0.00486817	0.265034	0.417	0.121	1	SD_6	RGL2
0.00495462	0.389539	0.458	0.155	1	SD_6	CLK4
0.00533227	0.375237	0.667	0.306	1	SD_6	ETF1
0.00583786	0.388965	0.667	0.431	1	SD_6	TTC37
0.00763337	0.268208	0.875	0.534	1	SD_6	RASSF2
0.00810422	0.273051	0.375	0.134	1	SD_6	ZNF91
0.00810806	0.390408	1	0.974	1	SD_6	RPS26
0.00821437	0.276576	0.542	0.388	1	SD_6	KANSL1
0.00844185	0.296465	0.833	0.509	1	SD_6	UBL7
0.00858767	0.27418	0.292	0.069	1	SD_6	C1orf174
0.00860161	0.324285	0.708	0.358	1	SD_6	VCL
0.00891744	0.302791	1	0.948	1	SD_6	ARHGDIB
0.0091584	0.303023	0.417	0.272	1	SD_6	STAG1
0.00918214	0.319407	0.75	0.401	1	SD_6	BTK
0.00933362	0.34969	0.333	0.116	1	SD_6	CRIM1
0.00933732	0.286856	0.875	0.72	1	SD_6	HNRNPM
0.00956439	0.323192	0.625	0.31	1	SD_6	HDAC1
0.00986702	0.277733	0.333	0.155	1	SD_6	GSPT1
0.0100409	0.289382	0.583	0.25	1	SD_6	FAM136A
0.0100435	0.269916	0.458	0.194	1	SD_6	UBE2N
0.0107598	0.36523	0.75	0.431	1	SD_6	ITPR1
0.0108063	0.490775	0.542	0.302	1	SD_6	PPP1R14A
0.0114748	0.3782	0.375	0.121	1	SD_6	AC005224.3
0.0121999	0.376897	0.583	0.254	1	SD_6	CDC16
0.0122283	0.28669	0.375	0.181	1	SD_6	POLDIP3
0.0126494	0.297991	0.542	0.237	1	SD_6	ODF2L
0.0126764	0.281444	0.292	0.155	1	SD_6	PRR14L
0.0130588	0.265583	0.958	0.69	1	SD_6	NOP10
0.0142051	0.266496	0.375	0.108	1	SD_6	CLCC1
0.01446	0.261935	0.167	0.078	1	SD_6	ELP1
0.0149453	0.346064	0.875	0.655	1	SD_6	ARHGAP9
0.015171	0.296855	0.333	0.194	1	SD_6	NFATC3
0.0157317	0.28143	0.375	0.302	1	SD_6	ISG20
0.0158406	0.271158	0.333	0.125	1	SD_6	GOLGA5
0.0161014	0.305619	0.583	0.259	1	SD_6	MTCH2
0.0166455	0.323399	0.958	0.793	1	SD_6	TOMM20
0.017092	0.289497	0.25	0.112	1	SD_6	ZNF460
0.0174084	0.533143	0.208	0.043	1	SD_6	AL136987
0.0180176	0.260603	0.292	0.082	1	SD_6	AK6
0.0181976	0.3338	0.375	0.138	1	SD_6	ZNF32
0.0190399	0.291795	0.625	0.47	1	SD_6	ELF1
0.0197648	0.285357	1	0.94	1	SD_6	PPP1R15A
0.0200213	0.273642	0.958	0.733	1	SD_6	ZNF706
0.0225022	0.29364	0.417	0.142	1	SD_6	IL18BP
0.0227813	0.316635	0.958	0.754	1	SD_6	OSTC
0.0237153	0.397651	0.333	0.207	1	SD_6	KIRREL3
0.0243332	0.309615	0.667	0.448	1	SD_6	PDCD6IP
0.025435	0.261346	0.583	0.319	1	SD_6	GPS1
0.025533	0.346821	0.75	0.487	1	SD_6	KHDRBS1
0.0286055	0.537158	0.5	0.319	1	SD_6	RGS2
0.0291526	0.299672	0.708	0.397	1	SD_6	PHF20L1
0.0306265	0.290964	0.333	0.142	1	SD_6	MDM2
0.0307089	0.261974	0.333	0.103	1	SD_6	CCDC28A
0.0309592	0.319213	0.5	0.272	1	SD_6	STX18
0.0319135	0.275938	0.292	0.091	1	SD_6	RAD51-AS1
0.0323093	0.293876	0.292	0.078	1	SD_6	KDM5D
0.033114	0.310797	0.542	0.302	1	SD_6	SNRNP27
0.033623	0.319028	0.625	0.336	1	SD_6	SLC25A39
0.0338416	0.344098	0.583	0.323	1	SD_6	CRELD2
0.0348942	0.347836	0.625	0.323	1	SD_6	SLC38A10
0.0350677	0.31432	0.75	0.539	1	SD_6	PIK3AP1
0.0357451	0.281211	0.417	0.181	1	SD_6	RNF40
0.0363693	0.283512	0.375	0.125	1	SD_6	PIK3C3
0.0374706	0.341298	0.583	0.328	1	SD_6	P3H2
0.0381448	0.282186	0.708	0.582	1	SD_6	CSF2RB
0.0387628	0.272412	0.25	0.069	1	SD_6	LYRM1
0.0391792	0.352893	0.417	0.233	1	SD_6	POU2F2
0.0401418	0.328613	0.917	0.815	1	SD_6	OGT
0.0406344	0.325832	0.708	0.431	1	SD_6	RSRC2
0.0410377	0.269586	0.875	0.789	1	SD_6	SPCS3
0.0412648	0.306397	0.375	0.22	1	SD_6	GIGYF2
0.0419575	0.271151	0.542	0.254	1	SD_6	CD300A
0.0429302	0.316873	0.625	0.345	1	SD_6	DHTKD1
0.0482508	0.278834	0.667	0.474	1	SD_6	CAPZA1
0.0495739	0.294984	0.625	0.586	1	SD_6	ZYX
7.89296e-10	0.557166	0.979	0.531	3.1069e-05	SD_R_6	HLA-DQA2
8.81279e-06	0.522396	0.149	0.019	0.346898	SD_R_6	MTCO1P12
0.000104324	0.373912	0.511	0.268	1	SD_R_6	SH3BP5
0.000277543	0.271475	0.255	0.067	1	SD_R_6	ZNF444
0.000674427	0.310687	0.319	0.11	1	SD_R_6	ATR
0.000705148	0.282567	0.489	0.278	1	SD_R_6	MTG1
0.000762294	0.287224	1	0.986	1	SD_R_6	HLA-C
0.00108265	0.346278	0.553	0.254	1	SD_R_6	CHAF1A
0.00109552	0.261897	0.34	0.158	1	SD_R_6	CDK5RAP1
0.00119459	0.300906	0.426	0.187	1	SD_R_6	RDH11
0.00168383	0.349502	0.872	0.761	1	SD_R_6	ACTR2
0.00227809	0.367274	0.936	0.823	1	SD_R_6	BTG1
0.0022795	0.284589	0.936	0.928	1	SD_R_6	LAPTM5
0.0023256	0.270273	0.426	0.201	1	SD_R_6	FGD5-AS1
0.00243408	0.337588	0.681	0.455	1	SD_R_6	PRDX1
0.00273607	0.273418	0.426	0.33	1	SD_R_6	ARMH1
0.00415847	0.294879	0.681	0.507	1	SD_R_6	ACAA1
0.0041659	0.286154	0.468	0.254	1	SD_R_6	ZCCHC7
0.00421903	0.300467	0.532	0.397	1	SD_R_6	AP1M1
0.00468278	0.552411	0.404	0.335	1	SD_R_6	AL138963.1
0.00500795	0.276127	0.851	0.842	1	SD_R_6	GAPT
0.00657888	0.278688	0.468	0.234	1	SD_R_6	AIDA
0.00673405	0.300404	0.745	0.584	1	SD_R_6	RGS19
0.00732061	0.296544	0.362	0.134	1	SD_R_6	GOLGA8B
0.00926831	0.278536	0.34	0.215	1	SD_R_6	PNOC
0.00995911	0.296785	0.681	0.469	1	SD_R_6	MRPS34
0.0100082	0.328538	0.681	0.531	1	SD_R_6	SLC1A5
0.0108193	0.271028	0.362	0.148	1	SD_R_6	CLUHP3
0.0124899	0.293303	0.532	0.368	1	SD_R_6	PRDX3
0.0130368	0.261948	0.362	0.172	1	SD_R_6	AMDHD2
0.0145283	0.265233	0.723	0.488	1	SD_R_6	SETX
0.0155482	0.266748	0.766	0.536	1	SD_R_6	NDUFV1
0.0173691	0.270176	0.83	0.651	1	SD_R_6	WSB1
0.0179376	0.271294	0.766	0.679	1	SD_R_6	PTBP3
0.0194888	0.265542	0.702	0.464	1	SD_R_6	WDFY2
0.0207864	0.274683	0.766	0.555	1	SD_R_6	GHITM
0.0220001	0.352532	0.787	0.656	1	SD_R_6	HSPA8
0.0304625	0.277107	0.574	0.44	1	SD_R_6	PRKCSH
0.0373916	0.267611	0.574	0.373	1	SD_R_6	BIN1
0.0378046	0.268725	0.894	0.727	1	SD_R_6	TXNIP

## Sheet: LTNP STNP-M5
p_val	avg_logFC	pct.1	pct.2	p_val_adj	cluster	gene
2.45389e-16	0.688933	0.475	0.301	9.65926e-12	LTNP_5	HLA-DRB5
7.78771e-16	0.39155	0.995	0.996	3.06548e-11	LTNP_5	MT-RNR2
1.90887e-15	0.559933	0.684	0.577	7.51387e-11	LTNP_5	AHNAK
4.54215e-14	0.360279	0.951	0.894	1.78793e-09	LTNP_5	CD74
2.38323e-11	1.07656	0.148	0.053	9.38109e-07	LTNP_5	AL138963.1
6.42373e-09	0.360783	0.483	0.439	0.000252857	LTNP_5	EEF2
1.52405e-08	0.371849	0.297	0.259	0.000599911	LTNP_5	HNRNPA1
5.81429e-08	0.419721	0.163	0.106	0.00228868	LTNP_5	GIMAP7
1.56875e-06	0.49851	0.188	0.082	0.0617506	LTNP_5	XIST
2.317e-06	0.397172	0.113	0.058	0.0912041	LTNP_5	RPS2P5
5.46325e-06	0.32432	0.388	0.337	0.21505	LTNP_5	AP1S2
1.37222e-05	0.28871	0.435	0.386	0.540147	LTNP_5	YBX1
2.70678e-05	0.526346	0.188	0.128	1	LTNP_5	HIST1H1E
3.22081e-05	0.366403	0.204	0.149	1	LTNP_5	HADHA
3.25837e-05	0.394912	0.171	0.122	1	LTNP_5	IKZF1
3.67443e-05	0.293385	0.611	0.53	1	LTNP_5	RPLP0
4.80191e-05	0.326034	0.206	0.162	1	LTNP_5	DPYD
5.74157e-05	0.322311	0.15	0.117	1	LTNP_5	STX7
7.87299e-05	0.28773	0.397	0.346	1	LTNP_5	IL17RA
8.54452e-05	0.334513	0.115	0.064	1	LTNP_5	PRMT2
8.8653e-05	0.267717	0.124	0.104	1	LTNP_5	LTBR
0.000114512	0.365237	0.223	0.158	1	LTNP_5	AKNA
0.000178586	0.340059	0.482	0.384	1	LTNP_5	CD52
0.000222966	0.270298	0.188	0.162	1	LTNP_5	NCOA4
0.000278841	0.374924	0.124	0.077	1	LTNP_5	SEPT2
0.000284187	0.282727	0.19	0.16	1	LTNP_5	NPM1
0.000296724	0.277229	0.158	0.084	1	LTNP_5	GSK3B
0.00031905	0.277992	0.128	0.098	1	LTNP_5	CLTC
0.000359276	0.349061	0.233	0.175	1	LTNP_5	IFI30
0.000389369	0.368717	0.159	0.115	1	LTNP_5	ITGA4
0.000686792	0.294721	0.113	0.082	1	LTNP_5	VPS35
0.00074056	0.312245	0.199	0.149	1	LTNP_5	STK10
0.000747471	0.387649	0.22	0.164	1	LTNP_5	TNFSF10
0.000823948	0.273111	0.249	0.209	1	LTNP_5	PILRA
0.000984912	0.263642	0.239	0.209	1	LTNP_5	PPT1
0.00108984	0.346281	0.128	0.077	1	LTNP_5	PCM1
0.00130965	0.272606	0.338	0.286	1	LTNP_5	PLEC
0.00169899	0.466508	0.279	0.24	1	LTNP_5	MT-ND6
0.00196346	0.28446	0.228	0.18	1	LTNP_5	FAM49B
0.00223987	0.283222	0.325	0.264	1	LTNP_5	DOCK8
0.00354494	0.262016	0.115	0.089	1	LTNP_5	IPMK
0.0042297	0.265024	0.301	0.24	1	LTNP_5	LRP1
0.00601129	0.2715	0.209	0.146	1	LTNP_5	ACTN4
0.00809339	0.273884	0.179	0.14	1	LTNP_5	PLCB2
0.00888417	0.299569	0.121	0.075	1	LTNP_5	OGT
0.0144202	0.261887	0.161	0.122	1	LTNP_5	TMX4
0.0151374	0.279564	0.136	0.095	1	LTNP_5	NBPF10
0.0162934	0.269498	0.11	0.075	1	LTNP_5	EZR
0.023645	0.271478	0.104	0.06	1	LTNP_5	SPG11
8.96268e-19	0.396894	0.984	0.97	3.52798e-14	STNP_5	S100A8
1.32452e-17	0.866964	0.515	0.276	5.21372e-13	STNP_5	MT2A
2.83967e-17	0.397036	0.916	0.791	1.11778e-12	STNP_5	ATP5F1E
4.99236e-14	0.517836	0.75	0.596	1.96514e-09	STNP_5	NFKBIA
9.1635e-14	0.416587	0.96	0.973	3.60703e-09	STNP_5	S100A9
5.66656e-13	0.555528	0.599	0.419	2.23053e-08	STNP_5	IFITM2
3.73162e-12	0.494171	0.59	0.407	1.46888e-07	STNP_5	JUND
3.95398e-12	0.459158	0.807	0.695	1.55641e-07	STNP_5	S100A12
2.48267e-11	0.450738	0.623	0.424	9.77254e-07	STNP_5	IFITM3
3.50831e-11	0.285509	0.995	0.99	1.38097e-06	STNP_5	FTL
4.08176e-09	0.683213	0.251	0.115	0.00016067	STNP_5	CXCL8
4.70538e-09	0.283017	0.825	0.675	0.000185218	STNP_5	H3F3B
2.05539e-08	0.337889	0.685	0.522	0.000809063	STNP_5	CYBA
4.59329e-08	0.697795	0.208	0.107	0.00180805	STNP_5	MT1X
4.81125e-08	0.503936	0.346	0.207	0.00189385	STNP_5	NAMPT
7.7405e-08	0.275748	0.858	0.743	0.00304689	STNP_5	KLF6
2.83145e-07	0.334749	0.53	0.364	0.0111454	STNP_5	CTSD
3.44058e-07	0.308889	0.605	0.44	0.0135431	STNP_5	COX6B1
7.01213e-07	0.555093	0.138	0.051	0.0276018	STNP_5	G0S2
3.41278e-06	0.263888	0.796	0.675	0.134337	STNP_5	DUSP1
6.06071e-06	0.306209	0.539	0.4	0.238568	STNP_5	UBL5
1.33914e-05	0.338435	0.166	0.086	0.527125	STNP_5	RBM8A
1.35201e-05	0.383532	0.188	0.088	0.53219	STNP_5	UBALD2
2.12674e-05	0.321189	0.406	0.271	0.837149	STNP_5	RAC1
4.98026e-05	0.36254	0.297	0.185	1	STNP_5	TNFAIP3
8.73214e-05	0.312444	0.25	0.144	1	STNP_5	AURKAIP1
0.000125691	0.279096	0.264	0.159	1	STNP_5	AC129492.3
0.000130315	0.365989	0.293	0.195	1	STNP_5	H1FX
0.000160943	0.26031	0.271	0.171	1	STNP_5	POLE4
0.000251915	0.260745	0.301	0.193	1	STNP_5	C4orf3
0.000356683	0.35943	0.175	0.094	1	STNP_5	IER5
0.0010943	0.292658	0.282	0.187	1	STNP_5	LY6E
0.00115183	0.419995	0.157	0.088	1	STNP_5	FOLR3
0.00150743	0.268619	0.137	0.069	1	STNP_5	TUBGCP2
0.00177179	0.296378	0.124	0.07	1	STNP_5	MTND2P28
0.00257526	0.364891	0.264	0.18	1	STNP_5	RETN
0.00274652	0.321607	0.109	0.053	1	STNP_5	PHC2
0.00289274	0.315323	0.199	0.123	1	STNP_5	ARPC4
0.00448065	0.277317	0.157	0.089	1	STNP_5	CTDNEP1
0.00703747	0.399991	0.113	0.064	1	STNP_5	IL1B

## Sheet: LTNP STNP-DC6
p_val	avg_logFC	pct.1	pct.2	p_val_adj	cluster	gene
2.51076e-06	0.341518	1	0.948	0.0988312	LTNP_6	HLA-DRB5
5.06716e-06	1.05322	0.136	0.086	0.199459	LTNP_6	LYZ
8.63093e-06	0.926099	0.085	0.121	0.339739	LTNP_6	S100A8
1.64301e-05	0.574538	0.356	0.379	0.646738	LTNP_6	AL138963.1
2.0377e-05	0.971367	0.085	0.103	0.8021	LTNP_6	S100A9
3.1062e-05	0.260968	0.475	0.414	1	LTNP_6	SDHAF3
0.000217901	0.478144	0.915	0.586	1	LTNP_6	HLA-DQA2
0.000218281	0.387925	0.407	0.103	1	LTNP_6	CRTC3
0.000249693	0.291471	0.373	0.224	1	LTNP_6	SNAP23
0.000273586	0.376779	0.78	0.655	1	LTNP_6	WSB1
0.000377531	0.409031	0.644	0.379	1	LTNP_6	NOTCH4
0.000396452	0.278122	0.559	0.534	1	LTNP_6	CYP46A1
0.000478679	0.351478	0.712	0.517	1	LTNP_6	DOCK8
0.000544557	0.307258	0.458	0.293	1	LTNP_6	PPP4R3A
0.000597656	0.33874	0.695	0.776	1	LTNP_6	AC109326
0.000629419	0.449609	0.542	0.224	1	LTNP_6	CD48
0.000717905	0.36471	0.661	0.397	1	LTNP_6	CHST12
0.000867426	0.339073	0.288	0.103	1	LTNP_6	TOPBP1
0.000878457	0.387375	0.729	0.534	1	LTNP_6	AC097375.1
0.000989325	0.277837	0.339	0.155	1	LTNP_6	WDR60
0.00112405	0.273668	0.763	0.759	1	LTNP_6	KMT2E
0.00119145	0.28403	0.339	0.086	1	LTNP_6	CHST11
0.00130798	0.291518	0.22	0.069	1	LTNP_6	POLG2
0.00135344	0.296515	0.339	0.069	1	LTNP_6	PPP2R2A
0.00136233	0.292956	0.356	0.155	1	LTNP_6	CLUHP3
0.00160516	0.3093	0.492	0.293	1	LTNP_6	SH3BP5
0.00179165	0.549067	0.627	0.448	1	LTNP_6	XIST
0.00233918	0.327177	0.576	0.379	1	LTNP_6	EIF4A1
0.0024102	0.322232	0.729	0.586	1	LTNP_6	PKM
0.00254661	0.262907	0.305	0.103	1	LTNP_6	BICD1
0.00259697	0.358071	0.814	0.828	1	LTNP_6	TXNIP
0.00295964	0.334437	0.441	0.155	1	LTNP_6	CD68
0.00302733	0.35419	0.898	0.879	1	LTNP_6	BTG1
0.00304075	0.352112	0.678	0.569	1	LTNP_6	SLC1A5
0.0031216	0.310075	0.458	0.19	1	LTNP_6	PTPRCAP
0.0038273	0.273606	0.356	0.172	1	LTNP_6	ZNF652
0.00395377	0.269643	0.525	0.345	1	LTNP_6	NDUFS2
0.00403619	0.359505	0.695	0.431	1	LTNP_6	EIF1AX
0.00404375	0.292751	1	1	1	LTNP_6	CCDC50
0.00423859	0.336199	0.661	0.466	1	LTNP_6	PECAM1
0.00447623	0.294265	0.39	0.293	1	LTNP_6	IFITM3
0.005066	0.260669	0.492	0.276	1	LTNP_6	ADK
0.00523778	0.329801	0.525	0.345	1	LTNP_6	PHF20
0.00571374	0.279279	0.407	0.155	1	LTNP_6	GTF2H5
0.00603577	0.271275	0.237	0.052	1	LTNP_6	JAK3
0.00694047	0.33508	0.339	0.086	1	LTNP_6	ORMDL2
0.00786462	0.280028	0.797	0.655	1	LTNP_6	SYF2
0.00837451	0.305048	0.356	0.103	1	LTNP_6	AC245060.2
0.0124731	0.32931	0.729	0.466	1	LTNP_6	WDFY2
0.0136137	0.367366	0.898	0.81	1	LTNP_6	NBPF14
0.0139415	0.366286	0.305	0.103	1	LTNP_6	PLEKHD1
0.0150341	0.304207	0.525	0.241	1	LTNP_6	SRP19
0.0153463	0.308866	0.831	0.672	1	LTNP_6	AL357143
0.0186236	0.291784	0.678	0.397	1	LTNP_6	PCBP1
0.0199106	0.281098	0.356	0.241	1	LTNP_6	KAT6A
0.0223365	0.320309	0.678	0.414	1	LTNP_6	NUMA1
0.0224892	0.274041	0.254	0.069	1	LTNP_6	SIGLEC6
0.0234687	0.290593	0.322	0.121	1	LTNP_6	FMNL1
0.0252054	0.273998	1	1	1	LTNP_6	HNRNPA2B1
0.0257266	0.26385	0.559	0.431	1	LTNP_6	RAD21
0.0257759	0.301937	0.305	0.103	1	LTNP_6	ATR
0.0270717	0.273993	0.458	0.259	1	LTNP_6	FLII
0.0274865	0.2711	0.847	0.81	1	LTNP_6	ACTR2
0.0280029	0.303827	0.525	0.259	1	LTNP_6	CYSTM1
0.0290518	0.376749	0.322	0.138	1	LTNP_6	RPL13P12
0.0292224	0.302198	0.373	0.259	1	LTNP_6	TSPO
0.029728	0.26268	0.322	0.103	1	LTNP_6	CHFR
0.0310521	0.286675	0.644	0.534	1	LTNP_6	CCT6A
0.0327301	0.382607	0.763	0.81	1	LTNP_6	S100A4
0.0338347	0.290629	0.475	0.224	1	LTNP_6	WASHC4
0.0339942	0.277869	0.525	0.293	1	LTNP_6	STRBP
0.0371841	0.28088	1	0.948	1	LTNP_6	PLEK
0.040837	0.269478	0.458	0.345	1	LTNP_6	PRRC2B
0.0420966	0.266796	0.831	0.793	1	LTNP_6	CHD9
0.0427806	0.335676	0.542	0.328	1	LTNP_6	RELT
0.0433038	0.266174	0.525	0.293	1	LTNP_6	GAK
0.0451055	0.282633	0.424	0.19	1	LTNP_6	NUDT4
0.0474941	0.322304	0.797	0.621	1	LTNP_6	RIPOR2
0.00116751	0.416773	0.707	0.542	1	STNP_6	LGMN
0.00123879	0.313391	1	0.949	1	STNP_6	ATP5MG
0.00186234	0.366944	0.741	0.627	1	STNP_6	CRIP1
0.00308017	0.362623	0.224	0.051	1	STNP_6	RRN3P3
0.00332111	0.269723	0.276	0.085	1	STNP_6	CEP120
0.00344711	0.31138	0.31	0.119	1	STNP_6	NUP50
0.00496548	0.324006	0.914	0.881	1	STNP_6	SLC25A5
0.00515668	0.332075	0.466	0.254	1	STNP_6	PSMD6
0.0055309	0.432199	0.138	0.034	1	STNP_6	MTCO1P12
0.00581954	0.331062	0.5	0.322	1	STNP_6	KIF2A
0.00653693	0.349016	0.983	0.949	1	STNP_6	PPP1R15A
0.00759745	0.307184	0.328	0.119	1	STNP_6	CMC2
0.00892689	0.289012	0.966	0.847	1	STNP_6	UBE2D2
0.00944027	0.318647	0.345	0.153	1	STNP_6	USP46
0.00980293	0.270354	0.569	0.271	1	STNP_6	SRP9
0.0105116	0.333346	0.414	0.169	1	STNP_6	RPS4Y1
0.0115615	0.292113	0.897	0.831	1	STNP_6	SPCS3
0.0116915	0.399424	0.31	0.085	1	STNP_6	UTY
0.0123093	0.399957	0.69	0.644	1	STNP_6	IRF4
0.0128778	0.309219	0.655	0.39	1	STNP_6	MRPS15
0.0132971	0.353735	0.655	0.492	1	STNP_6	CBX4
0.0138135	0.303213	0.931	0.746	1	STNP_6	OGT
0.0172582	0.265971	0.741	0.61	1	STNP_6	PHPT1
0.0243823	0.418928	0.966	0.898	1	STNP_6	MT-ATP8
0.024411	0.266191	0.328	0.186	1	STNP_6	PPA1
0.0334155	0.284179	0.534	0.288	1	STNP_6	MRPL55
0.0339469	0.341781	0.707	0.525	1	STNP_6	JUND
0.0342786	0.2779	0.483	0.305	1	STNP_6	SLC25A39
0.0397318	0.268277	0.966	0.881	1	STNP_6	GNG5
0.04182	0.452784	0.81	0.627	1	STNP_6	FOS
0.0474633	0.279199	0.448	0.237	1	STNP_6	CCDC25

## Sheet: HC AS SM-24-8
p_val	avg_logFC	pct.1	pct.2	p_val_adj	cluster	gene
1.22553e-151	0.72284	0.744	0.46	4.82403e-147	AS_8	RPS2P5
1.23111e-123	0.398563	0.97	0.922	4.84601e-119	AS_8	RPS2
8.37807e-84	0.377055	0.933	0.87	3.29786e-79	AS_8	RPL26
2.36539e-62	0.337849	0.934	0.868	9.31088e-58	AS_8	RPL23A
2.56278e-60	0.274277	0.971	0.932	1.00879e-55	AS_8	RPL37A
7.28933e-50	0.354145	0.856	0.73	2.8693e-45	AS_8	RPL36A
2.91867e-48	0.370356	0.661	0.534	1.14888e-43	AS_8	AC024293
9.41396e-45	0.293352	0.896	0.831	3.70562e-40	AS_8	RPS20
9.41205e-43	0.355519	0.497	0.376	3.70487e-38	AS_8	AC008038
2.07527e-38	0.472858	0.458	0.31	8.16888e-34	AS_8	AC245014.1
2.42481e-38	0.384253	0.384	0.24	9.54479e-34	AS_8	RPS10
5.59333e-38	0.372323	0.652	0.539	2.2017e-33	AS_8	HIST1H4C
1.95572e-27	0.277211	0.714	0.616	7.69829e-23	AS_8	RPL22
1.48171e-22	0.369248	0.314	0.177	5.83245e-18	AS_8	CD8B
4.61675e-16	0.294319	0.246	0.158	1.81729e-11	AS_8	ID2
1.74874e-14	0.281817	0.5	0.373	6.88356e-10	AS_8	RPS4Y1
5.28456e-13	0.312745	0.178	0.096	2.08016e-08	AS_8	LINC02446
5.90983e-13	0.276555	0.206	0.121	2.32629e-08	AS_8	CD8A
3.90386e-95	0.35653	0.935	0.914	1.53668e-90	HC_8	RPS29
2.52176e-91	0.502679	0.861	0.771	9.92642e-87	HC_8	MT-ATP8
1.13553e-34	0.266603	0.237	0.119	4.46979e-30	HC_8	CTSW
1.05011e-61	0.368065	0.87	0.797	4.13353e-57	SM_8	JUN
1.95099e-54	0.352635	0.727	0.605	7.67968e-50	SM_8	ZFP36L2
1.84242e-47	0.387323	0.662	0.547	7.25231e-43	SM_8	JUNB
9.65975e-47	0.334341	0.305	0.178	3.80237e-42	SM_8	PIM1
5.22695e-45	0.421737	0.467	0.355	2.05749e-40	SM_8	NEAT1
5.44733e-39	0.346568	0.582	0.463	2.14423e-34	SM_8	IER2
1.10639e-38	0.345524	0.508	0.37	4.3551e-34	SM_8	DUSP1
9.2614e-37	0.269916	0.796	0.711	3.64556e-32	SM_8	TSC22D3
4.60338e-33	0.391723	0.431	0.343	1.81203e-28	SM_8	FOS
4.74191e-24	0.401828	0.294	0.205	1.86656e-19	SM_8	AHNAK
9.87602e-24	0.400464	0.221	0.206	3.8875e-19	SM_8	AL138963.1
1.2195e-22	0.264951	0.782	0.777	4.80032e-18	SM_8	RPS26

## Sheet: HC AS SM-M3
p_val	avg_logFC	pct.1	pct.2	p_val_adj	cluster	gene
9.05407e-78	0.399947	1	0.982	3.56395e-73	AS_3	RPL37
8.65335e-77	0.392523	0.997	0.979	3.40622e-72	AS_3	RPL39
1.04885e-67	0.610092	0.826	0.612	4.12859e-63	AS_3	RPL36A
5.67686e-58	0.525779	0.858	0.737	2.23458e-53	AS_3	RPL26
5.91817e-57	0.687506	0.746	0.503	2.32957e-52	AS_3	AC245014.1
1.7217e-41	0.383997	0.973	0.913	6.77714e-37	AS_3	RPS21
3.84472e-36	0.345206	0.965	0.928	1.5134e-31	AS_3	RPL37A
3.03945e-31	0.347316	0.918	0.855	1.19642e-26	AS_3	RPL38
8.17307e-30	0.285748	0.987	0.973	3.21716e-25	AS_3	RPS28
5.51741e-27	0.390553	0.676	0.57	2.17182e-22	AS_3	RPL23A
4.27583e-26	0.609734	0.206	0.055	1.68309e-21	AS_3	MTND1P23
1.80225e-19	0.307977	0.741	0.653	7.09422e-15	AS_3	RPS20
2.04167e-19	0.422141	0.349	0.198	8.03663e-15	AS_3	RPS2P5
2.53477e-19	0.3074	0.824	0.743	9.97761e-15	AS_3	RPS29
1.02131e-17	0.34286	0.819	0.727	4.02017e-13	AS_3	RPS26
1.50538e-17	0.317779	0.567	0.459	5.92563e-13	AS_3	COX6A1
3.55014e-17	0.366923	0.336	0.182	1.39744e-12	AS_3	RPS4Y1
2.0871e-15	0.365722	0.224	0.11	8.21547e-11	AS_3	SNORD3B-1
2.85697e-15	0.264439	0.858	0.795	1.12459e-10	AS_3	RPL27A
4.74342e-15	0.381338	0.609	0.485	1.86715e-10	AS_3	HLA-DQB1
9.25363e-13	0.307482	0.294	0.19	3.64251e-08	AS_3	NDUFA11
2.64655e-12	0.267418	0.313	0.237	1.04176e-07	AS_3	SNRPG
1.46466e-11	0.297136	0.358	0.26	5.76533e-07	AS_3	BLOC1S1
2.15066e-11	0.275172	0.349	0.257	8.46566e-07	AS_3	MICOS10
1.68013e-10	0.281732	0.179	0.101	6.61348e-06	AS_3	AC007952.3
3.15861e-09	0.280464	0.709	0.643	0.000124332	AS_3	DUSP6
8.86427e-07	0.296166	0.288	0.21	0.0348924	AS_3	HLA-DQA1
1.77601e-19	0.274091	0.484	0.303	6.99089e-15	HC_3	XIST
2.17049e-16	0.306494	0.801	0.672	8.54368e-12	HC_3	HLA-DRB5
1.48148e-30	0.599696	0.629	0.561	5.83157e-26	SM_3	MT2A
8.24703e-20	0.385556	0.305	0.243	3.24628e-15	SM_3	HIST1H1E
1.39477e-17	0.470001	0.171	0.075	5.49024e-13	SM_3	MT1E
2.9473e-16	0.29729	0.258	0.222	1.16015e-11	SM_3	MT1X
2.12804e-15	0.280729	0.277	0.164	8.37661e-11	SM_3	PIM3
5.05671e-15	0.314172	0.29	0.179	1.99047e-10	SM_3	TIPARP
1.24178e-13	0.289698	0.709	0.668	4.88803e-09	SM_3	IFITM3
1.46927e-13	0.264147	0.358	0.273	5.78349e-09	SM_3	MAFB
1.10655e-11	0.300353	0.378	0.282	4.35572e-07	SM_3	LY6E
1.2193e-10	0.260189	0.266	0.187	4.79952e-06	SM_3	CDKN1A
4.31558e-10	0.283554	0.156	0.086	1.69874e-05	SM_3	IFI44L
2.21546e-08	0.306451	0.132	0.081	0.000872073	SM_3	AL133415
2.41537e-06	0.384075	0.222	0.191	0.0950762	SM_3	AL138963.1

## Sheet: HC AS SM-M4
p_val	avg_logFC	pct.1	pct.2	p_val_adj	cluster	gene
4.98026e-72	0.617991	0.957	0.842	1.96038e-67	AS_4	RPL26
5.17273e-57	0.649215	0.829	0.536	2.03614e-52	AS_4	RPL36A
7.251e-57	0.356874	1	0.992	2.85421e-52	AS_4	RPL37
8.01025e-46	0.732686	0.671	0.369	3.15308e-41	AS_4	AC245014.1
2.96159e-45	0.286293	1	0.997	1.16577e-40	AS_4	RPL39
1.55598e-42	0.667498	0.727	0.467	6.12482e-38	AS_4	HLA-DQB1
2.25998e-41	0.394859	0.983	0.952	8.89597e-37	AS_4	RPL37A
6.63784e-36	0.297949	0.995	0.971	2.61285e-31	AS_4	RPS21
3.41873e-33	0.323404	0.995	0.976	1.34571e-28	AS_4	RPS27
1.04207e-32	0.434233	0.936	0.798	4.10191e-28	AS_4	RPS29
1.10439e-31	0.614551	0.55	0.245	4.34722e-27	AS_4	RETN
2.74479e-30	0.380739	0.927	0.844	1.08043e-25	AS_4	RPL38
2.5056e-29	0.341841	0.979	0.932	9.8628e-25	AS_4	RPS2
1.29041e-23	0.474054	0.533	0.299	5.07944e-19	AS_4	RPS2P5
1.0622e-22	0.371867	0.955	0.877	4.18115e-18	AS_4	RPS26
8.4463e-22	0.374647	0.803	0.685	3.32472e-17	AS_4	RPL23A
2.84341e-17	0.366779	0.927	0.854	1.11925e-12	AS_4	HLA-DRB1
3.38247e-15	0.336531	0.498	0.29	1.33144e-10	AS_4	RPS4Y1
1.24024e-12	0.314989	0.659	0.501	4.88197e-08	AS_4	COX6A1
3.93e-11	0.33737	0.379	0.233	1.54697e-06	AS_4	AC024293
1.34752e-09	0.291506	0.578	0.434	5.30424e-05	AS_4	RPL22
9.74329e-09	0.328524	0.254	0.126	0.000383525	AS_4	HLA-DQA1
1.11879e-08	0.260684	0.597	0.504	0.000440389	AS_4	DDX21
1.46799e-08	0.281771	0.45	0.334	0.000577844	AS_4	SNHG5
1.13776e-07	0.266498	0.415	0.29	0.00447856	AS_4	MICOS10
1.38221e-07	0.268634	0.299	0.199	0.0054408	AS_4	RPS10
2.16759e-07	0.273164	0.355	0.222	0.00853227	AS_4	NDUFA11
4.27372e-07	0.278103	0.472	0.349	0.0168227	AS_4	SMIM25
5.8985e-23	0.406728	0.352	0.156	2.32182e-18	HC_4	XIST
1.76441e-16	0.315214	0.863	0.73	6.94523e-12	HC_4	HLA-DRB5
2.53399e-12	0.263371	0.157	0.057	9.97456e-08	HC_4	RPL13P12
2.44365e-08	0.290149	0.434	0.312	0.000961896	HC_4	ID2
3.62796e-35	0.296895	1	1	1.42807e-30	SM_4	FTH1
9.52457e-23	0.590088	0.549	0.495	3.74916e-18	SM_4	MT2A
9.13736e-20	0.330304	0.772	0.774	3.59674e-15	SM_4	IFITM3
2.07076e-19	0.265271	0.926	0.915	8.15114e-15	SM_4	DUSP1
3.55782e-19	0.481093	0.293	0.226	1.40046e-14	SM_4	CXCL8
4.82198e-15	0.271536	0.492	0.449	1.89808e-10	SM_4	TMEM176A
7.55683e-14	0.276589	0.209	0.193	2.9746e-09	SM_4	MT1X
6.35155e-13	0.300956	0.202	0.121	2.50016e-08	SM_4	CDKN1A
1.28158e-12	0.288622	0.652	0.561	5.04469e-08	SM_4	ZFP36L1
3.32136e-12	0.300381	0.409	0.309	1.30739e-07	SM_4	NAMPT
3.47294e-11	0.269388	0.647	0.55	1.36705e-06	SM_4	NCF1
1.7418e-08	0.379236	0.213	0.145	0.000685625	SM_4	IL1B
5.41339e-06	0.264619	0.125	0.071	0.213087	SM_4	G0S2

## Sheet: HC AS SM-T10
p_val	avg_logFC	pct.1	pct.2	p_val_adj	cluster	gene
3.59527e-16	0.687287	0.742	0.513	1.41521e-11	AS_10	RPS2P5
2.08653e-11	0.379952	0.839	0.867	8.2132e-07	AS_10	RPS20
3.36266e-10	0.300536	0.258	0.231	1.32364e-05	AS_10	SNX1
2.64968e-08	0.37288	0.968	0.931	0.00104299	AS_10	RPL26
6.21199e-08	0.312413	0.946	0.951	0.00244523	AS_10	RPL38
6.45755e-08	0.31094	0.978	0.983	0.00254188	AS_10	RPS29
7.49107e-08	0.499282	0.409	0.279	0.00294871	AS_10	HLA-DQB1
8.55207e-08	0.371458	0.903	0.802	0.00336635	AS_10	SON
2.0064e-07	0.460851	0.419	0.262	0.00789779	AS_10	GOLGB1
3.60655e-07	0.390069	0.667	0.626	0.0141964	AS_10	HIST1H4C
1.28729e-06	0.265946	0.237	0.215	0.0506718	AS_10	PPP1R10
1.43545e-06	0.40953	0.344	0.2	0.0565038	AS_10	RPS10
1.50928e-06	0.298308	0.269	0.218	0.0594099	AS_10	HDAC2
1.70901e-06	0.268805	0.376	0.356	0.0672717	AS_10	CWC15
1.85718e-06	0.391094	0.581	0.441	0.0731044	AS_10	SEC62
1.93052e-06	0.360782	0.785	0.696	0.075991	AS_10	RPL36A
2.18373e-06	0.264819	0.323	0.283	0.085958	AS_10	MZT2B
3.44192e-06	0.306331	0.731	0.685	0.135484	AS_10	SEPT7
5.60874e-06	0.264195	0.645	0.688	0.220777	AS_10	ANKRD12
7.74162e-06	0.397243	0.462	0.29	0.304733	AS_10	AC008038
2.34648e-05	0.298337	1	1	0.923644	AS_10	MALAT1
2.77238e-05	0.266028	0.398	0.373	1	AS_10	YTHDC1
3.01546e-05	0.300258	0.14	0.068	1	AS_10	C12orf45
3.0773e-05	0.306406	0.462	0.413	1	AS_10	IFI16
3.17243e-05	0.296281	0.613	0.619	1	AS_10	ATRX
4.76692e-05	0.34519	0.387	0.281	1	AS_10	SMC5
5.73393e-05	0.334814	0.785	0.61	1	AS_10	GIMAP7
6.39367e-05	0.28783	0.269	0.209	1	AS_10	XPO1
6.52981e-05	0.329659	0.366	0.249	1	AS_10	RPS17
9.53898e-05	0.260615	0.72	0.674	1	AS_10	EML4
0.000100224	0.285831	0.247	0.18	1	AS_10	CHORDC1
0.000101117	0.333825	0.527	0.428	1	AS_10	DDX21
0.000112724	0.279775	0.989	0.982	1	AS_10	RPL21
0.000118381	0.287961	0.527	0.455	1	AS_10	ZRANB2
0.000177447	0.42005	0.194	0.154	1	AS_10	Z93241
0.000668259	0.264911	0.591	0.53	1	AS_10	RPL22
0.000743357	0.264719	0.355	0.267	1	AS_10	NDUFA11
0.000820487	0.312481	0.398	0.294	1	AS_10	SMC4
0.000982817	0.270319	0.215	0.143	1	AS_10	SLC25A24
0.00132584	0.278164	0.323	0.218	1	AS_10	IPCEF1
0.00135426	0.275259	0.667	0.571	1	AS_10	RESF1
0.00186803	0.301696	0.43	0.328	1	AS_10	PYHIN1
0.0037921	0.296613	0.613	0.543	1	AS_10	CD69
0.00479028	0.328606	0.57	0.514	1	AS_10	HLA-DRB1
0.00731387	0.273553	0.591	0.463	1	AS_10	AC024293
0.0076991	0.279394	0.247	0.175	1	AS_10	CCR7
0.0466025	0.277517	0.656	0.615	1	AS_10	IL7R
2.46626e-06	0.278418	0.552	0.452	0.0970793	HC_10	SNHG5
8.0416e-19	0.593632	0.716	0.5	3.16542e-14	SM_10	DUSP1
8.07619e-12	0.422388	0.759	0.588	3.17903e-07	SM_10	ZFP36L2
1.28193e-09	0.386361	0.231	0.078	5.04607e-05	SM_10	DUSP2
1.91876e-09	0.329833	0.777	0.639	7.5528e-05	SM_10	LY6E
1.60735e-08	0.374205	0.299	0.139	0.000632701	SM_10	TNFRSF4
1.92368e-08	0.304532	0.892	0.784	0.000757219	SM_10	TSC22D3
4.18009e-08	0.44363	0.548	0.392	0.00164541	SM_10	FOS
4.21952e-08	0.327074	0.344	0.189	0.00166093	SM_10	PIM1
7.67009e-08	0.440858	0.542	0.399	0.00301918	SM_10	MT2A
3.65692e-07	0.26972	0.207	0.081	0.0143947	SM_10	TNFRSF18

[truncated: 5 more sheets: HC AS SM-NK6, HC AS MD SD SDR-24-8, HC AS MD SD SDR-24-12, HC AS MD SD SDR-24-18, HC AS MD SD SDR-24-19]
